# Supplementary material for: G/T Substitution in Intron 1 of the UNC13B Gene Is Associated With Increased Risk of Nephropathy in Patients With Type 1 Diabetes
Source: Oxford University Press journal article supplement (doi:10.2337/db08-0073), 2008-07-16
Supplement: db08-0073_suppl.doc [file db08-0073_suppl.doc]

We acknowledge all the physicians and nurses at each centre participating in the collection of patients:

Anjalankoski Health Center: S.Koivula, T.Uggeldahl; Central Finland Central Hospital: T.Forslund, A.Halonen, A.Koistinen, P.Koskiaho, M.Laukkanen, J.Saltevo, M.Tiihonen; Central Hospital of Aland Islands: A.-C.Blomqvist, M.Forsen, H.Granlund, B.Nyroos; Central Hospital of Kanta-Hame: P.Kinnunen, A.Orvola, T.Salonen, A.Vähänen; Central Hospital of Kymenlaakso: R.Paldanius, M.Riihelä, L.Ryysy; Central Hospital of Lansi-Pohja: P.Nyländen, A.Sademies; Central Ostrobothnian Hospital District: S.Anderson, B.Asplund, U.Byskata, T.Virkkala; City of Espoo Health Center: (Espoonlahti): A.Nikkola, E.Ritola; (Leppävaara): L.Penttinen, H-L.Siekkinen; City of Tampere Health Center: P.Alarotu, S.Gummerus, A.Kallio, H.Kirkkopelto-Jokinen, E.Kujansuu, M.Kuortti, T.Maijala, T.Niskanen, T.Saaristo, A.Vadén; City of Vantaa Health Center: (Korso): R.Toivonen, H.Virtanen; (Martinlaakso): M.Laine, T.Pellonpää, R.Puranen; (Myyrmäki): A.Airas, J.Laakso, K.Rautavaara; (Rekola): M.Erola, E.Jatkola; (Tikkurila): R.Lönnblad, A.Malm, J.Mäkelä, E.Rautamo; Helsinki University Central Hospital (Department of Medicine, Division of Nephrology): C-G af Björkesten, J.Fagerudd, S.Fröjdö, R.Kilpikari, S.Lindh, M.Parkkonen, K.Pettersson-Fermholm, M.Rosengård-Bärlund, H.Rosvall, M.Rönnback, R.Sallinen, A.Sandelin, M.Saraheimo, L.Sjölind, L.Thorn, T.Vesisenaho, J.Wadén; Iisalmi Hospital: E.Toivanen; Jokilaakso Hospital, Jämsä: A.Parta, I.Pirttiniemi; Jorvi Hospital, Espoo: S.Aranko, S.Ervasti, R.Kauppinen-Mäkelin, A.Kuusisto, T.Leppälä, K.Nikkilä, L.Pekkonen; Kainuu Central Hospital: S.Jokelainen, P.Kemppainen, A-M.Mankinen, M.Sankari; Kerava Health Center: H.Stuckey, P.Suominen; Kivelä Hospital, Helsinki: A.Aimolahti, E.Huovinen; Koskela Hospital, Helsinki: V.Ilkka, M.Lehtimäki; Kouvola Health Center: E.Koskinen, T.Siitonen; Kuopio University Hospital: E.Huttunen, R.Ikäheimo, P.Karhapää, P.Kekäläinen, M.Laakso, T.Lakka, E.Lampainen, L.Mykkänen, L.Niskanen, U.Tuovinen, I.Vauhkonen, E.Voutilainen; Kuusamo Health Center: E.Isopoussu, H.Suvanto, E.Vierimaa; Kuusankoski Hospital: E.Kilkki, L.Riihelä; Laakso Hospital, Helsinki: T.Meriläinen, P.Poukka, R.Savolainen, N.Uhlenius; Lahti City Hospital: A.Mäkelä, M.Tanner; Lapland Central Hospital: L.Hyvärinen, S.Severinkangas, T.Tulokas; Lappeenranta Health Center: P.Linkola, I.Pulli; Lohja Hospital: T.Granlund, M.Saari, T.Salonen; Länsi-Uusimaa Hospital, Tammisaari: I.-M.Jousmaa, J.Rinne; Malmi Hospital, Helsinki: H.Lanki, S.Moilanen, M.Tilly-Kiesi; Mikkeli Central Hospital: A.Gynther, R.Manninen, P.Nironen, M.Salminen, T.Vänttinen; North Karelian Hospital: U-M.Henttula, A.Rissanen, H.Turtola, M.Voutilainen; Oulaskangas Hospital, Oulainen: E.Jokelainen, P.-L.Jylkkä, E.Kaarlela, J.Vuolaspuro; Oulu Health Center: L.Hiltunen, R.Häkkinen, S.Keinänen-Kiukaanniemi; Päijät-Häme Central Hospital: H.Haapamäki, A.Helanterä, H.Miettinen; Palokka Health Center: (Palokka): P.Sopanen, L.Welling; (Vaajakoski): K.Mäkinen, P.Sopanen; Pietarsaari Hospital: M-L.Holmbäck, B.Isomaa, L.Sarelin; Pori City Hospital: P.Ahonen, P.Merensalo, K.Sävelä; Porvoo Hospital: M.Kallio, B.Rask, S.Rämö; Rauma Hospital: K.Laine, K.Saarinen, T.Salminen; Riihimäki Hospital: E.Immonen, L.Juurinen; Salo Hospital: A.Alanko, J.Lapinleimu, P.Rautio, M.Virtanen; Satakunta Central Hospital: M.Juhola, P.Kunelius, M.-L.Lahdenmäki, P.Pääkkönen, M.Rautavirta; Savonlinna Central Hospital: T.Pulli, P.Sallinen, H.Valtonen, A.Vartia; Seinajoki Central Hospital: E.Korpi-Hyövälti, T.Latvala, E.Leijala; South Karelia Hospital District: T.Hotti, R.Härkönen, U.Nyholm, R.Vanamo†; Tampere University Hospital: I.Ala-Houhala, T.Kuningas, P.Lampinen, M.Määttä, H.Oksala, T.Oksanen, K.Salonen, H.Tauriainen, S.Tulokas; Turku Health Center: I.Hämäläinen, H.Virtamo, M.Vähätalo; Turku University Central Hospital: M.Asola, K.Breitholz, R.Eskola, K.Metsärinne, U.Pietilä, P.Saarinen, R.Tuominen, S.Äyräpää; Vammala Hospital: I.Isomäki, R.Kroneld, M.Tapiolinna-Mäkelä; Vasa Central Hospital: S.Bergkulla, U.Hautamäki, V.-A.Myllyniemi, I.Rusk.

| **Supplemental Table S1: Clinical characteristics of 2499 Type 1 diabetic patients with and without diabetic nephropathy included in the first-line case-control study** | | | | | | | | | | |  |  |
| --- | --- | --- | --- | --- | --- | --- | --- | --- | --- | --- | --- | --- |
|  | | | | |  |  |  |  |  |  |  |  |
|  | ***DENMARK (n = 952)*** | | | ***FINLAND (n = 856)*** | |  | ***FRANCE (n = 691)*** | | | ***COMBINED (N = 2499)a*** | |  |
|  | ***Cases***  ***n = 489*** | ***Controls***  ***n = 463*** |  | ***Cases***  ***n = 387*** | ***Controls***  ***n = 469*** |  | ***Cases***  ***n = 300*** | ***Controls***  ***n = 391*** |  | ***Cases***  ***n = 1176*** | ***Controls***  ***n = 1323*** | ***P-valueb*** |
|  |  |  |  |  |  |  |  |  |  |  |  |  |
| *Sex (male / female)* | 293 / 196 | 247 / 216 |  | 227 / 160 | 187 / 282 |  | 165 / 135 | 197 / 194 |  | 685 / 491 | 631 / 692 | <.0001 |
| *Age (years)* | 41.8 ± 10.3 | 45.1 ± 11.3 |  | 41.3 ± 9.3 | 44.0 ± 10.1 |  | 43.1 ± 11.2 | 45.2 ± 11.4 |  | 42.0 ± 10.2 | 44.8 ± 11.0 | <.0001 |
| *Age at onset of diabetes (years)* | 13.9 ± 8.2 | 17.8 ± 8.7 |  | 12.1 ± 6.9 | 14.3 ± 7.8 |  | 14.9 ± 8.3 | 15.6 ± 8.9 |  | 13.6 ± 7.9 | 15.9 ± 8.6 | <.0001 |
| *Diabetes duration (years)* | 27.9 ± 8.7 | 27.3 ± 10.1 |  | 29.2 ± 8.1 | 29.8 ± 7.9 |  | 28.2 ± 9.2 | 30.0 ± 8.7 |  | 28.4 ± 8.7 | 29.2 ± 9.0 | 0.20 |
|  |  |  |  |  |  |  |  |  |  |  |  |  |
| *BMI (kg/m2)* | 24.1± 3.4 | 24.2 ± 3.5 |  | 25.3 ± 3.9 | 25.2 ± 3.1 |  | 24.7 ± 3.8 | 24.7 ± 3.1 |  | 24.4 ± 3.6 | 24.6 ± 3.3 | 0.15 |
| *Insulin Dose (IU)* | 44 ± 15 | 42 ± 14 |  | 52 ± 18 | 45 ± 14 |  | 41 ± 13 | 44 ± 15 |  | 46 ± 16 | 44 ± 14 | <.0001 |
| *HbA1C (%)* | 9.4 ± 1.5 | 8.4 ± 1.1 |  | 8.9 ± 1.6 | 8.2 ± 1.3 |  | 8.6 ± 1.8 | 8.3 ± 1.3 |  | 9.0 ± 1.6 | 8.3 ± 1.2 | 0.007 |
|  |  |  |  |  |  |  |  |  |  |  |  |  |
| *Systolic BP (mmHg)* | 145 ± 22 | 134 ± 19 |  | 147 ± 22 | 133 ± 17 |  | 144 ± 19 | 128 ± 16 |  | 145 ± 21 | 132 ± 17 | <.0001 |
| *Diastolic BP (mmHg)* | 83 ± 12 | 76 ± 9 |  | 84 ± 11 | 78 ± 9 |  | 82 ± 11 | 73 ± 9 |  | 83 ± 11 | 76 ± 9 | <.0001 |
| *Antihypertensive medication* | 67% | 14% |  | 92% | 24% |  | 82% | 28% |  | 79% | 22% | <.0001 |
|  |  |  |  |  |  |  |  |  |  |  |  |  |
| *UAER (mg/24hr)c* | 526 (458-603) | 7 (7-8) |  | 356 (293-432) | 9 (8-10) |  | 268 (202-356) | 9 (9-10) |  | 393 (348-443) | 8 (8-9) | <.0001 |
| *Serum creatinine (μmol/l)* | 111 (106-116) | 79 (78-80) |  | 143 (135-153) | 86 (84-87) |  | 132 (124-140) | 80 (78-82) |  | 126 (122-130) | 81 (81-82) | <.0001 |
| *Renal Replacement Therapy* | 8% | - |  | 32% | - |  | 22% | - |  | 19% | - |  |
|  |  |  |  |  |  |  |  |  |  |  |  |  |
| *Retinopathy (nil/simplex/proliferative)* | 7/139/343 | 166/173/124 |  | 14/36/330 | 142/158/164 |  | 0/17/283 | 1/147/243 |  | 21/192/956 | 309/478/531 | <.0001 |
| *Smokers* | 66% | 64% |  | 56% | 38% |  | 50% | 37% |  | 53% | 45% | <.0001 |
| *Cardiovascular disease* | 10% | 4% |  | 23% | 5% |  | 16% | 8% |  | 16% | 5% | <.0001 |
| Data are n, mean ± SD, or geometric mean (95%CI) | | |  |  |  |  |  |  |  |  |  |  |
| aWith the exception of sex, duration of diabetes and blood pressure in cases, | | | | | | |  |  |  |  |  |  |
| all covariates show significant heterogeneity across populations, p ≤ 0.01 | | | | | | |  |  |  |  |  |  |
| bP-value for test of difference between cases & controls | | |  |  |  |  |  |  |  |  |  |  |
| cUAER (urinary albumin excretion rate) - some patients with previous persistent macroalbuminuria | | | | | | | |  |  |  |  |  |
| had UAER below 300 mg/24h at investigation due to ongoing antihypertensive medication | | | | | | | |  |  |  |  |  |

|  | Finnish case/control replication  dataset (n = 1026) | | Patients with microalbuminuria | | | |
| --- | --- | --- | --- | --- | --- | --- |
| Cases  n = 412 | Controls  n = 614 | DENMARK  n= 60 | FINLAND  n = 421 | FRANCE  n = 193 | COMBINED  n = 674 |
|  |  |  |  |  |  |
| Sex (male / female) | 240 / 172 | 284 / 330 | 29 / 31 | 250 / 171 | 105 / 88 | 384 / 290 |
| Age (years) | 42.2 ± 9.3 | 39.44 ± 11.9 | 54.5 ± 10.7 | 38.6 ± 11.7 | 41.36 ± 12.5 | 40.8 ± 12.6 |
| Age at onset of diabetes (years) | 11.4 ± 6.7 | 14.3 ± 8.5 | 16.3 ± 8.7 | 12.5 ± 8.0 | 15.6 ± 8.8 | 13.7 ± 8.5 |
| Diabetes duration (years) | 30.8 ± 7.9 | 25.1 ± 9.6 | 32.2 ± 9.3 | 26.0 ± 10.7 | 25.7 ± 9.5 | 27.0 ± 10.8 |
|  |  |  |  |  |  |  |
| BMI (kg/m2) | 25.2 ± 3.8 | 24.7 ± 3.2 | 24.7 ± 3.0 | 25.5 ± 4.8 | 24.2 ± 3.7 | 25.1 ± 4.4 |
| HbA1C (%) | 8.8 ± 1.4 | 8.2 ± 1.2 | 8.7 ± 0.9 | 8.7 ± 1.4 | 8.7 ± 1.7 | 8.7 ± 1.5 |
|  |  |  |  |  |  |  |
| Systolic BP (mmHg) | 147.7 ± 21.0 | 130.6 ± 16.2 | 145.3 ± 19.0 | 135.8 ± 17.0 | 134.1 ± 17.4 | 136.2 ± 17.5 |
| Diastolic BP (mmHg) | 83.9 ± 10.9 | 78.2 ± 9.5 | 72.9 ± 8.5 | 80.7 ± 9.8 | 75.9 ± 10.4 | 78.7 ± 10.3 |
| Antihypertensive medication | 95% | 19% | 73% | 65% | 55% | 63% |
|  |  |  |  |  |  |  |
| Renal Replacement Therapy | 35% | - | - | - | - | - |
|  |  |  |  |  |  |  |
| Retinopathy (non proliferative/proliferative) | 59 / 347 | 495 / 173 | 6 / 54 | 212 / 203 | 41 / 152 | 259 / 409 |
| Smokers | 61% | 38% | 65% | 59% | 50% | 57% |

**Supplemental Table S2: Clinical characteristics of 1700 Type 1 diabetic patients included in the replication study**

Data are n, mean ± SD, or geometric mean (95%CI)

**S3** *Allele frequencies distribution of the* ***344*** *genotyped polymorphisms in cases and controls of the EURAGEDIC data sample*

| **Polymorphisms** | |  |  | **Denmark** | | | **Finland** | | | **France** | | | | **Whole** |
| --- | --- | --- | --- | --- | --- | --- | --- | --- | --- | --- | --- | --- | --- | --- |
| **Gene** | **RS number** | **Alleles** | **AA**  **change** | **Controls** | **Cases** | **p(1)** | **Controls** | **Cases** | **p(1)** | **Controls** | | **Cases** | **p(1)** | **p(2)** |
| ADD1 | **rs2285084*** | **A/G** |  | **0.179** | **0.200** | **0.2406** | **0.213** | **0.180** | **0.1031** | **0.220** | **0.168** | | **0.0211** | **0.0194158** |
| **rs4961*** | **G/T** | **G/W** | **0.180** | **0.197** | **0.3471** | **0.213** | **0.189** | **0.2246** | **0.218** | **0.165** | | **0.0164** | **0.0381684** |
| rs17777371 | C/G |  | 0.080 | 0.087 | 0.5594 | 0.054 | 0.052 | 0.8236 | 0.081 | 0.058 | | 0.1143 | 0.4358780 |
| ADD2 | rs2287099 | C/T |  | 0.209 | 0.205 | 0.8679 | 0.335 | 0.330 | 0.8527 | 0.196 | 0.178 | | 0.4129 | 0.8825999 |
| rs2287095 | C/T |  | 0.243 | 0.229 | 0.4847 | 0.241 | 0.262 | 0.3511 | 0.269 | 0.269 | | 0.9976 | 0.7377565 |
| ADD3 | rs12268910 | T/G |  | 0.133 | 0.153 | 0.2222 | 0.161 | 0.136 | 0.1615 | 0.225 | 0.231 | | 0.8195 | 0.3159757 |
| rs3731566 | G/A |  | 0.469 | 0.460 | 0.6937 | 0.466 | 0.480 | 0.5789 | 0.377 | 0.358 | | 0.469 | 0.7652537 |
| ADORA3 | rs35511654 | A/C | I/L | 0.144 | 0.154 | 0.5244 | 0.094 | 0.093 | 0.9692 | 0.158 | 0.177 | | 0.3662 | 0.7621354 |
| rs2229155 | T/C | A/A | 0.188 | 0.175 | 0.4695 | 0.173 | 0.174 | 0.9441 | 0.157 | 0.165 | | 0.6922 | 0.8834761 |
| rs1415792 | A/G |  | 0.189 | 0.175 | 0.4558 | 0.173 | 0.172 | 0.9489 | 0.179 | 0.168 | | 0.6003 | 0.8458065 |
| ADRA1A | rs1383914 | A/G |  | 0.478 | 0.490 | 0.6192 | 0.499 | 0.555 | 0.0225 | 0.445 | 0.445 | | 0.9981 | 0.2004522 |
| rs1048101* | T/C | C/R | 0.434 | 0.421 | 0.5678 | 0.404 | 0.344 | 0.0127 | 0.451 | 0.484 | | 0.2437 | 0.0482685 |
| ADRA1B | rs3729604 | G/A | G/G | 0.179 | 0.154 | 0.1426 | 0.149 | 0.163 | 0.4461 | 0.188 | 0.185 | | 0.8938 | 0.4535913 |
| ADRA1D | rs2236554 | A/T |  | 0.372 | 0.361 | 0.5987 | 0.329 | 0.313 | 0.4892 | 0.426 | 0.402 | | 0.3856 | 0.6278307 |
| rs709024 | G/A |  | 0.422 | 0.432 | 0.645 | 0.382 | 0.387 | 0.8247 | 0.412 | 0.414 | | 0.9273 | 0.9650359 |
| ADRA2A | rs553668 | A/G |  | 0.179 | 0.184 | 0.8092 | 0.152 | 0.151 | 0.9219 | 0.169 | 0.165 | | 0.851 | 0.9888364 |
| ADRB1 | rs1801253 | G/C | G/R | 0.257 | 0.248 | 0.6669 | 0.243 | 0.238 | 0.8003 | 0.270 | 0.320 | | 0.0532 | 0.3096074 |
| rs1801252 | A/G | S/G | 0.167 | 0.152 | 0.3557 | 0.181 | 0.203 | 0.2813 | 0.131 | 0.132 | | 0.9338 | 0.5774363 |
| ADRB2 | rs1042718 | C/A | R/R | 0.139 | 0.133 | 0.7165 | 0.155 | 0.172 | 0.358 | 0.209 | 0.207 | | 0.9261 | 0.8243956 |
| rs1042713 | G/A |  | 0.333 | 0.349 | 0.4525 | 0.385 | 0.400 | 0.5298 | 0.372 | 0.403 | | 0.2639 | 0.4789443 |
| ADRBK1 | rs2071007 | G/A |  | 0.073 | 0.075 | 0.8733 | 0.124 | 0.130 | 0.7042 | 0.074 | 0.092 | | 0.2343 | 0.6936359 |
| ADRBK2 | rs3817819 | C/T |  | 0.302 | 0.334 | 0.1413 | 0.371 | 0.358 | 0.5721 | 0.349 | 0.375 | | 0.3325 | 0.2998489 |
| AGPAT2 | ss95211016 | C/A | R/S | 0.005 | 0.001 | 0.0909 | 0.016 | 0.013 | 0.5796 | 0.001 | 0.000 | | 0.3762 | 0.2499018 |
| rs9411215 | T/C |  | 0.295 | 0.302 | 0.7377 | 0.307 | 0.319 | 0.5742 | 0.325 | 0.368 | | 0.097 | 0.3815675 |
| rs4880119 | C/T |  | 0.158 | 0.165 | 0.6642 | 0.156 | 0.162 | 0.7167 | 0.183 | 0.219 | | 0.1101 | 0.4347957 |
| rs6951 | C/G |  | 0.222 | 0.232 | 0.6058 | 0.202 | 0.206 | 0.8651 | 0.223 | 0.223 | | 0.9836 | 0.9702442 |
| rs10320 | C/T |  | 0.194 | 0.196 | 0.9135 | 0.206 | 0.214 | 0.6639 | 0.193 | 0.226 | | 0.1375 | 0.5478655 |
| AGT (**‡)** | rs699 | T/C | M/T | 0.389 | 0.403 | 0.5594 | 0.421 | 0.389 | 0.2094 | 0.409 | 0.459 | | 0.0679 | 0.1393366 |
| rs2478522 | A/G | L/L | 0.094 | 0.084 | 0.4417 | 0.063 | 0.069 | 0.665 | 0.081 | 0.081 | | 0.9986 | 0.8736916 |
| rs3827749 | C/T |  | 0.169 | 0.167 | 0.9378 | 0.228 | 0.237 | 0.6668 | 0.194 | 0.208 | | 0.5183 | 0.8949843 |
| AKR1B10 | rs4732035 | T/C |  | 0.238 | 0.260 | 0.2524 | 0.357 | 0.352 | 0.8568 | 0.251 | 0.252 | | 0.9866 | 0.7975247 |
| rs10350593 | C/T |  | 0.311 | 0.290 | 0.3583 | 0.207 | 0.219 | 0.5679 | 0.326 | 0.276 | | 0.0555 | 0.1754349 |
| rs10378078 | A/G | N/D | 0.079 | 0.065 | 0.2609 | 0.066 | 0.068 | 0.8758 | 0.104 | 0.091 | | 0.4389 | 0.5961133 |
| rs2303312 | C/T | P/S | 0.011 | 0.014 | 0.5636 | 0.007 | 0.004 | 0.4723 | 0.027 | 0.031 | | 0.6257 | 0.7326458 |
| rs10373019 | G/A |  | 0.431 | 0.414 | 0.4735 | 0.335 | 0.352 | 0.4944 | 0.356 | 0.370 | | 0.6283 | 0.6991961 |
| rs7800848 | A/G | T/T | 0.499 | 0.510 | 0.645 | 0.391 | 0.410 | 0.4707 | 0.448 | 0.494 | | 0.1124 | 0.3440553 |
| ALOX12 | rs1126667 | A/G | Q/R | 0.445 | 0.409 | 0.1219 | 0.358 | 0.344 | 0.5533 | 0.401 | 0.462 | | 0.0286 | 0.0516714 |
| rs434473* | A/G | N/S | 0.440 | 0.407 | 0.1538 | 0.361 | 0.343 | 0.433 | 0.382 | 0.454 | | 0.0079 | 0.0194929 |
| ALOX5 | rs2303885 | G/A |  | 0.144 | 0.130 | 0.3788 | 0.187 | 0.200 | 0.4849 | 0.183 | 0.179 | | 0.829 | 0.7085519 |
| rs2029253 | A/G |  | 0.374 | 0.388 | 0.5508 | 0.426 | 0.455 | 0.2565 | 0.409 | 0.370 | | 0.1611 | 0.2716958 |
| rs10900215 | G/C |  | 0.155 | 0.157 | 0.9208 | 0.234 | 0.223 | 0.5753 | 0.133 | 0.140 | | 0.7435 | 0.9318124 |
| rs3740107 | A/G |  | 0.282 | 0.233 | 0.014 | 0.195 | 0.215 | 0.3009 | 0.235 | 0.227 | | 0.7279 | 0.0721620 |
| ANG **(§)** | ss76866573 | C/T |  | 0.058 | 0.045 | 0.2186 | 0.042 | 0.042 | 0.9943 | 0.082 | 0.067 | | 0.2887 | 0.4769732 |
| ANGPT1 | rs6469108 | T/C |  | 0.497 | 0.508 | 0.6137 | 0.434 | 0.443 | 0.7087 | 0.481 | 0.470 | | 0.6732 | 0.8732962 |
| ss95210423 | C/T |  | 0.189 | 0.161 | 0.1087 | 0.238 | 0.245 | 0.7544 | 0.177 | 0.156 | | 0.3154 | 0.2931431 |
| rs2507799 | G/C |  | 0.433 | 0.437 | 0.8648 | 0.333 | 0.350 | 0.4477 | 0.411 | 0.411 | | 0.9969 | 0.9283136 |
| ANGPT2 | ss95210423 | G/T | T/T | 0.065 | 0.059 | 0.6004 | 0.052 | 0.062 | 0.3871 | 0.059 | 0.066 | | 0.6051 | 0.6870708 |
| rs3020221 | G/A | Q/Q | 0.366 | 0.376 | 0.6531 | 0.336 | 0.322 | 0.5686 | 0.387 | 0.420 | | 0.2116 | 0.5326634 |
| rs1961222 | G/A | T/T | 0.326 | 0.347 | 0.3515 | 0.307 | 0.297 | 0.6569 | 0.343 | 0.362 | | 0.4502 | 0.6056518 |
| rs1982386 | G/A |  | 0.233 | 0.235 | 0.9379 | 0.278 | 0.272 | 0.7704 | 0.249 | 0.255 | | 0.8028 | 0.9820031 |
| AR | rs2361634 | A/G |  | 0.075 | 0.070 | 0.7027 | 0.050 | 0.046 | 0.6867 | 0.061 | 0.031 | | 0.0165 | 0.1394333 |
| rs5918764* | A/G |  | 0.077 | 0.081 | 0.7537 | 0.083 | 0.055 | 0.027 | 0.070 | 0.120 | | 0.0015 | 0.0019977 |
| ss95212308 | A/G |  | 0.065 | 0.063 | 0.8371 | 0.057 | 0.064 | 0.5441 | 0.080 | 0.081 | | 0.9218 | 0.9423303 |
| ATF2 | rs2302663 | C/T |  | 0.059 | 0.071 | 0.3079 | 0.030 | 0.055 | 0.0154 | 0.077 | 0.067 | | 0.4936 | 0.0594563 |
| ATP1A2 | rs2854248 | T/A |  | 0.324 | 0.355 | 0.154 | 0.361 | 0.317 | 0.058 | 0.377 | 0.385 | | 0.7802 | 0.1275175 |
| rs1023420* | T/C |  | 0.162 | 0.190 | 0.1157 | 0.163 | 0.137 | 0.128 | 0.192 | 0.230 | | 0.091 | 0.0396907 |
| rs4017977 | G/A | S/S | 0.189 | 0.188 | 0.9211 | 0.141 | 0.142 | 0.9313 | 0.194 | 0.198 | | 0.8451 | 0.9956335 |
| ATP1B1 | rs1892094 | C/T |  | 0.468 | 0.466 | 0.934 | 0.499 | 0.512 | 0.5958 | 0.458 | 0.452 | | 0.8456 | 0.9589831 |
| rs1200157 | G/A |  | 0.426 | 0.432 | 0.7699 | 0.442 | 0.421 | 0.382 | 0.393 | 0.355 | | 0.15 | 0.3966453 |
| rs1200138* | C/T |  | 0.267 | 0.216 | 0.0098 | 0.213 | 0.227 | 0.4914 | 0.231 | 0.263 | | 0.1867 | 0.0293223 |
| ATP1B2 | ss95213588 | G/A |  | 0.072 | 0.062 | 0.3831 | 0.106 | 0.104 | 0.8946 | 0.037 | 0.038 | | 0.9671 | 0.8995506 |
| rs1642763 | A/G | G/G | 0.228 | 0.275 | 0.0204 | 0.238 | 0.263 | 0.2392 | 0.174 | 0.179 | | 0.8254 | 0.0874804 |
| rs1642764 | C/T |  | 0.469 | 0.496 | 0.2359 | 0.480 | 0.509 | 0.2255 | 0.410 | 0.458 | | 0.0759 | 0.0876301 |
| ATP2A2 | ss95213588 | --/TA |  | 0.060 | 0.055 | 0.6539 | 0.052 | 0.050 | 0.8515 | 0.088 | 0.083 | | 0.7284 | 0.9367371 |
| ss95212412 | G/A | A/A | 0.082 | 0.100 | 0.192 | 0.076 | 0.078 | 0.8712 | 0.059 | 0.052 | | 0.5942 | 0.5937376 |
| ATP2A3 | rs1062683 | C/T | D/D | 0.185 | 0.225 | 0.0318 | 0.115 | 0.134 | 0.2574 | 0.198 | 0.207 | | 0.6725 | 0.1086252 |
| rs8068346 | A/G |  | 0.142 | 0.177 | 0.04 | 0.102 | 0.120 | 0.2633 | 0.166 | 0.167 | | 0.943 | 0.1613641 |
| rs1043246 | G/C |  | 0.186 | 0.189 | 0.8935 | 0.148 | 0.142 | 0.7162 | 0.160 | 0.167 | | 0.7376 | 0.9593937 |
| BIRC2 | ss95212545 | C/T | A/V | 0.047 | 0.045 | 0.808 | 0.116 | 0.132 | 0.3215 | 0.070 | 0.093 | | 0.1348 | 0.3491074 |
| CCR5(**†)** | rs1799987* | A/G |  | 0.461 | 0.441 | 0.3819 | 0.418 | 0.484 | 0.0072 | 0.442 | 0.473 | | 0.27 | 0.0253653 |
| rs2734648 | G/T |  | 0.349 | 0.336 | 0.5568 | 0.276 | 0.328 | 0.0209 | 0.360 | 0.390 | | 0.2518 | 0.0698646 |
| CD36 **(§)** | rs3173798 | T/C |  | 0.063 | 0.060 | 0.7938 | 0.063 | 0.069 | 0.6454 | 0.059 | 0.060 | | 0.8978 | 0.9558804 |
| rs3173803 | G/A |  | 0.429 | 0.474 | 0.0534 | 0.442 | 0.467 | 0.3017 | 0.431 | 0.431 | | 0.9979 | 0.2196166 |
| ss95212623 | G/T | A/S | 0.000 | 0.001 | 0.3295 | 0.002 | 0.001 | 0.677 | 0.000 | 0.000 | | 1 | 0.8087808 |
| ss95210901 | T/G | L/* | 0.000 | 0.001 | 0.3295 | 0.000 | 0.000 | 1 | 0.000 | 0.002 | | 0.2557 | 0.5505179 |
| CNDP1(**†)** | D18S880 | CTG repeat | 5L/6-7L | 0.408 | 0.410 | 0.9409 | 0.405 | 0.403 | 0.9322 | 0.370 | 0.377 | | 0.8152 | 0.9950977 |
| CTGF **(§)** | rs12529636 | A/G |  | 0.088 | 0.080 | 0.5451 | 0.082 | 0.102 | 0.1459 | 0.112 | 0.106 | | 0.7641 | 0.4692925 |
| rs9493150 | C/G |  | 0.273 | 0.292 | 0.3509 | 0.258 | 0.245 | 0.5513 | 0.279 | 0.302 | | 0.3394 | 0.4879327 |
| CYP2E1 | ss95211433 | G/A | R/H | 0.000 | 0.000 | 1 | 0.007 | 0.009 | 0.527 | 0.009 | 0.004 | | 0.251 | 0.6704900 |
| rs2480256 | A/G |  | 0.183 | 0.175 | 0.6474 | 0.234 | 0.208 | 0.2019 | 0.204 | 0.252 | | 0.0452 | 0.1140099 |
| rs6413419 | G/A | V/I | 0.017 | 0.014 | 0.491 | 0.024 | 0.022 | 0.7082 | 0.023 | 0.025 | | 0.8639 | 0.8789145 |
| rs915908 | G/A |  | 0.117 | 0.145 | 0.0739 | 0.141 | 0.150 | 0.5945 | 0.154 | 0.146 | | 0.6874 | 0.3208627 |
| DGKA | rs7297871 | G/A |  | 0.193 | 0.201 | 0.6671 | 0.224 | 0.199 | 0.2036 | 0.168 | 0.189 | | 0.3121 | 0.3881354 |
| rs2291615 | G/A |  | 0.291 | 0.291 | 0.9946 | 0.232 | 0.249 | 0.4002 | 0.288 | 0.262 | | 0.2872 | 0.6310960 |
| DRD1 | rs5326 | G/A |  | 0.132 | 0.118 | 0.3525 | 0.185 | 0.172 | 0.5038 | 0.129 | 0.111 | | 0.3299 | 0.4606227 |
| rs4532 | G/A |  | 0.353 | 0.389 | 0.1143 | 0.383 | 0.360 | 0.3524 | 0.339 | 0.343 | | 0.8792 | 0.3513262 |
| DRD2 | rs12363125 | G/A |  | 0.377 | 0.391 | 0.5373 | 0.483 | 0.474 | 0.7199 | 0.376 | 0.379 | | 0.9234 | 0.9141866 |
| rs2283265 | G/T |  | 0.140 | 0.147 | 0.6808 | 0.216 | 0.206 | 0.6352 | 0.142 | 0.136 | | 0.7382 | 0.8918479 |
| EDN1 (**‡)** | rs2070699 | G/T |  | 0.490 | 0.550 | 0.009 | 0.468 | 0.469 | 0.9647 | 0.413 | 0.409 | | 0.8827 | 0.1359242 |
| rs1800543 | C/T |  | 0.214 | 0.229 | 0.4279 | 0.221 | 0.190 | 0.1146 | 0.233 | 0.237 | | 0.8595 | 0.3869227 |
| rs5369 | A/G | E/E | 0.088 | 0.123 | 0.013 | 0.085 | 0.093 | 0.5734 | 0.153 | 0.158 | | 0.809 | 0.1156143 |
| rs1794849 | C/T |  | 0.250 | 0.296 | 0.0258 | 0.245 | 0.264 | 0.3532 | 0.332 | 0.355 | | 0.3698 | 0.0771603 |
| rs1629862 | A/G |  | 0.088 | 0.123 | 0.0138 | 0.085 | 0.094 | 0.5146 | 0.150 | 0.155 | | 0.798 | 0.1108097 |
| EDN2 **(§)** | rs11210280* | C/A |  | 0.175 | 0.206 | 0.0959 | 0.229 | 0.206 | 0.2681 | 0.202 | 0.143 | | 0.0069 | 0.0083268 |
| rs6674101 | C/T |  | 0.264 | 0.227 | 0.0711 | 0.220 | 0.227 | 0.7696 | 0.305 | 0.339 | | 0.2034 | 0.1737882 |
| rs11572342 | C/T |  | 0.008 | 0.006 | 0.6732 | 0.005 | 0.009 | 0.3031 | 0.008 | 0.017 | | 0.1086 | 0.2673675 |
| rs5800 | G/A |  | 0.169 | 0.134 | 0.0413 | 0.129 | 0.156 | 0.1035 | 0.149 | 0.150 | | 0.9803 | 0.0899358 |
| rs11210278* | G/A |  | 0.179 | 0.211 | 0.0808 | 0.236 | 0.204 | 0.112 | 0.208 | 0.153 | | 0.0091 | 0.0044986 |
| EDN3 **(§)** | rs11570357 | C/T |  | 0.035 | 0.036 | 0.8654 | 0.014 | 0.021 | 0.2754 | 0.026 | 0.025 | | 0.917 | 0.8036224 |
| EGF **(§)** | rs10002971 | A/C |  | 0.314 | 0.306 | 0.6979 | 0.268 | 0.283 | 0.5079 | 0.347 | 0.331 | | 0.5318 | 0.7654783 |
| EGFR | rs2072454 | C/T | N/N | 0.459 | 0.433 | 0.259 | 0.469 | 0.504 | 0.161 | 0.476 | 0.498 | | 0.4137 | 0.2294583 |
| rs13222549 | G/C |  | 0.377 | 0.377 | 0.9749 | 0.299 | 0.328 | 0.2022 | 0.352 | 0.378 | | 0.3159 | 0.4751347 |
| rs2692456 | G/A |  | 0.201 | 0.217 | 0.3824 | 0.161 | 0.182 | 0.2575 | 0.174 | 0.158 | | 0.4251 | 0.3854714 |
| ENO1 | rs2071412 | C/A |  | 0.278 | 0.269 | 0.6554 | 0.258 | 0.231 | 0.201 | 0.246 | 0.217 | | 0.2085 | 0.3036728 |
| rs2781066 | G/A |  | 0.176 | 0.169 | 0.657 | 0.218 | 0.227 | 0.6891 | 0.161 | 0.148 | | 0.5201 | 0.8222319 |
| rs2038904 | T/C |  | 0.178 | 0.168 | 0.5697 | 0.167 | 0.150 | 0.345 | 0.202 | 0.198 | | 0.8498 | 0.7334016 |
| ENO2 | rs3213434 | C/T |  | 0.282 | 0.286 | 0.8633 | 0.260 | 0.262 | 0.9374 | 0.323 | 0.321 | | 0.9428 | 0.9973021 |
| rs1061223* | C/T |  | 0.226 | 0.206 | 0.3089 | 0.206 | 0.207 | 0.9766 | 0.205 | 0.145 | | 0.004 | 0.0365605 |
| FGF1 | rs34002 | C/A |  | 0.466 | 0.442 | 0.3164 | 0.487 | 0.466 | 0.41 | 0.406 | 0.428 | | 0.4184 | 0.4428086 |
| FGFR1 | rs2280846 | G/A |  | 0.094 | 0.122 | 0.0531 | 0.158 | 0.133 | 0.1495 | 0.076 | 0.063 | | 0.3612 | 0.0687914 |
| rs3925 | C/T |  | 0.260 | 0.248 | 0.5523 | 0.174 | 0.180 | 0.7312 | 0.209 | 0.233 | | 0.3111 | 0.6565549 |
| rs4647905 | G/C |  | 0.243 | 0.229 | 0.4537 | 0.172 | 0.180 | 0.694 | 0.194 | 0.208 | | 0.5197 | 0.7279134 |
| FGFR2 | rs2278202 | C/T |  | 0.420 | 0.419 | 0.9634 | 0.477 | 0.503 | 0.2949 | 0.453 | 0.446 | | 0.8135 | 0.8176258 |
| rs3135810 | C/G |  | 0.167 | 0.152 | 0.3902 | 0.210 | 0.219 | 0.6625 | 0.147 | 0.143 | | 0.8447 | 0.8034045 |
| rs1047100 | A/G | V/V | 0.244 | 0.248 | 0.821 | 0.267 | 0.251 | 0.4699 | 0.210 | 0.196 | | 0.5021 | 0.7726003 |
| FLT1 | rs2296284 | C/T |  | 0.301 | 0.273 | 0.1903 | 0.397 | 0.391 | 0.7729 | 0.278 | 0.313 | | 0.1686 | 0.2859436 |
| rs3751395 | G/T |  | 0.444 | 0.448 | 0.8693 | 0.372 | 0.407 | 0.1343 | 0.465 | 0.478 | | 0.6463 | 0.5223938 |
| rs9551471 | T/C |  | 0.325 | 0.324 | 0.9392 | 0.266 | 0.246 | 0.3635 | 0.297 | 0.259 | | 0.1282 | 0.3949467 |
| FLT4 | rs2242221 | T/C |  | 0.291 | 0.328 | 0.0952 | 0.231 | 0.231 | 0.9862 | 0.259 | 0.302 | | 0.074 | 0.1272563 |
| rs399108 | G/A |  | 0.455 | 0.492 | 0.1138 | 0.482 | 0.476 | 0.7937 | 0.416 | 0.464 | | 0.0792 | 0.1297849 |
| FN1 | rs2577289 | A/T |  | 0.213 | 0.185 | 0.1438 | 0.256 | 0.281 | 0.2635 | 0.236 | 0.276 | | 0.0947 | 0.0806613 |
| rs7592898 | T/A |  | 0.391 | 0.423 | 0.1637 | 0.394 | 0.406 | 0.6349 | 0.395 | 0.338 | | 0.0317 | 0.0759378 |
| rs1053238 | A/C |  | 0.395 | 0.424 | 0.2107 | 0.394 | 0.400 | 0.7933 | 0.392 | 0.338 | | 0.0396 | 0.1231608 |
| rs1250203 | C/A |  | 0.125 | 0.122 | 0.836 | 0.067 | 0.054 | 0.2719 | 0.133 | 0.152 | | 0.3251 | 0.5171575 |
| rs2289200 | G/T |  | 0.283 | 0.278 | 0.8469 | 0.253 | 0.269 | 0.4646 | 0.298 | 0.290 | | 0.7653 | 0.8794354 |
| GAPD | rs2886093 | T/C |  | 0.409 | 0.381 | 0.2257 | 0.440 | 0.429 | 0.6441 | 0.350 | 0.359 | | 0.75 | 0.6183913 |
| GATA2 | rs2713603 | C/T |  | 0.402 | 0.376 | 0.2612 | 0.368 | 0.420 | 0.0327 | 0.371 | 0.369 | | 0.962 | 0.1423886 |
| rs2713604 | A/G |  | 0.325 | 0.331 | 0.7696 | 0.389 | 0.356 | 0.1658 | 0.343 | 0.307 | | 0.1869 | 0.2793846 |
| rs3803 | C/T |  | 0.212 | 0.214 | 0.952 | 0.190 | 0.162 | 0.1352 | 0.206 | 0.208 | | 0.9066 | 0.6366218 |
| GATA3 | rs2277228 | G/A |  | 0.406 | 0.402 | 0.8367 | 0.461 | 0.462 | 0.9465 | 0.436 | 0.433 | | 0.9125 | 0.9955133 |
| ss95210827 | A/G |  | 0.024 | 0.028 | 0.5872 | 0.037 | 0.039 | 0.8845 | 0.048 | 0.038 | | 0.4235 | 0.8052426 |
| GATA4 | rs2409814 | C/G |  | 0.442 | 0.461 | 0.43 | 0.386 | 0.345 | 0.0904 | 0.451 | 0.425 | | 0.3496 | 0.1975496 |
| rs10503425 | G/C |  | 0.189 | 0.196 | 0.7267 | 0.177 | 0.178 | 0.9736 | 0.138 | 0.125 | | 0.4788 | 0.9039214 |
| rs3729851 | G/A |  | 0.143 | 0.138 | 0.7389 | 0.112 | 0.090 | 0.1361 | 0.126 | 0.144 | | 0.3222 | 0.3340762 |
| rs12156163 | C/T |  | 0.224 | 0.220 | 0.8396 | 0.164 | 0.160 | 0.8064 | 0.215 | 0.224 | | 0.7197 | 0.9635155 |
| GCG | rs5645 | C/T | Y/Y | 0.031 | 0.024 | 0.2927 | 0.007 | 0.006 | 0.808 | 0.014 | 0.010 | | 0.5052 | 0.6429928 |
| rs6732914 | A/G |  | 0.032 | 0.026 | 0.4531 | 0.008 | 0.006 | 0.8029 | 0.015 | 0.015 | | 0.9768 | 0.9132177 |
| GCGR (**†)** | rs1801483 | G/A | G/S | 0.008 | 0.006 | 0.7027 | 0.002 | 0.001 | 0.6746 | 0.005 | 0.019 | | 0.0174 | 0.1427531 |
| GLO1 | rs2736654 | A/C | E/A | 0.454 | 0.431 | 0.3164 | 0.367 | 0.369 | 0.9248 | 0.465 | 0.440 | | 0.3577 | 0.6074761 |
| rs7769206 | A/T | G/G | 0.104 | 0.116 | 0.4174 | 0.075 | 0.098 | 0.097 | 0.112 | 0.135 | | 0.1978 | 0.1399759 |
| rs1049346 | C/T |  | 0.493 | 0.484 | 0.6968 | 0.385 | 0.430 | 0.0644 | 0.495 | 0.477 | | 0.5255 | 0.2775146 |
| GPD2 | rs2116665 | G/A | R/H | 0.321 | 0.326 | 0.8338 | 0.352 | 0.355 | 0.8936 | 0.269 | 0.319 | | 0.0409 | 0.3225366 |
| ss95212205 | T/C |  | 0.189 | 0.167 | 0.211 | 0.157 | 0.174 | 0.3497 | 0.178 | 0.147 | | 0.135 | 0.1616779 |
| ss95213202 | A/G |  | 0.016 | 0.012 | 0.4714 | 0.036 | 0.049 | 0.1861 | 0.001 | 0.009 | | 0.0495 | 0.0922016 |
| rs297581 | A/G |  | 0.420 | 0.402 | 0.4261 | 0.399 | 0.393 | 0.7977 | 0.461 | 0.438 | | 0.4038 | 0.6804821 |
| HAGH | rs238678 | T/C |  | 0.173 | 0.167 | 0.7485 | 0.131 | 0.156 | 0.1581 | 0.134 | 0.143 | | 0.6265 | 0.5179733 |
| rs238679 | T/C |  | 0.235 | 0.234 | 0.9679 | 0.184 | 0.205 | 0.2858 | 0.169 | 0.208 | | 0.0787 | 0.2645314 |
| rs2076452* | A/G |  | 0.232 | 0.291 | 0.0037 | 0.316 | 0.313 | 0.9261 | 0.165 | 0.209 | | 0.045 | 0.0074473 |
| HNF4A(**†)** | rs1884614 | C/T |  | 0.156 | 0.195 | 0.0284 | 0.202 | 0.195 | 0.725 | 0.160 | 0.159 | | 0.9471 | 0.2474351 |
| rs2144908 | A/G |  | 0.163 | 0.198 | 0.0531 | 0.204 | 0.197 | 0.7168 | 0.156 | 0.158 | | 0.8943 | 0.3435650 |
| rs3818247 | G/T |  | 0.337 | 0.372 | 0.1124 | 0.341 | 0.339 | 0.9465 | 0.348 | 0.338 | | 0.6855 | 0.5138496 |
| HSD11B2(**‡)** | rs5479 | C/A | T/T | 0.042 | 0.045 | 0.7523 | 0.038 | 0.035 | 0.8082 | 0.050 | 0.063 | | 0.3307 | 0.7822959 |
| IGF1R **(§)** | rs2229765* | G/A | E/E | 0.493 | 0.521 | 0.2358 | 0.477 | 0.435 | 0.0903 | 0.454 | 0.401 | | 0.0545 | 0.0355106 |
| rs2593053 | G/A |  | 0.413 | 0.427 | 0.511 | 0.322 | 0.336 | 0.5405 | 0.431 | 0.396 | | 0.1959 | 0.4420869 |
| IGF2/INS/TH cluster | rs3213223 | C/T |  | 0.161 | 0.180 | 0.2694 | 0.132 | 0.166 | 0.0484 | 0.176 | 0.171 | | 0.7744 | 0.1631200 |
| rs3213225 | C/T |  | 0.388 | 0.374 | 0.5456 | 0.401 | 0.382 | 0.4372 | 0.431 | 0.436 | | 0.8379 | 0.7807476 |
| rs3213232 | C/T |  | 0.062 | 0.056 | 0.5916 | 0.067 | 0.071 | 0.7807 | 0.075 | 0.086 | | 0.4757 | 0.8049570 |
| rs680 | A/G |  | 0.260 | 0.253 | 0.6951 | 0.247 | 0.228 | 0.3568 | 0.331 | 0.306 | | 0.3427 | 0.5527758 |
| rs1003483 | G/T |  | 0.403 | 0.403 | 0.9989 | 0.379 | 0.394 | 0.5374 | 0.478 | 0.464 | | 0.609 | 0.8967546 |
| rs1004446 | A/G |  | 0.302 | 0.315 | 0.5464 | 0.281 | 0.324 | 0.0532 | 0.246 | 0.289 | | 0.077 | 0.0575674 |
| rs2070762 | A/G |  | 0.443 | 0.441 | 0.9276 | 0.476 | 0.461 | 0.5292 | 0.499 | 0.471 | | 0.3161 | 0.7136336 |
| rs2585 | C/T |  | 0.263 | 0.263 | 0.9939 | 0.249 | 0.238 | 0.5736 | 0.342 | 0.314 | | 0.2714 | 0.7128624 |
| rs3802971 | A/G |  | 0.109 | 0.103 | 0.6761 | 0.139 | 0.126 | 0.428 | 0.072 | 0.093 | | 0.1611 | 0.4086161 |
| rs4244808 | G/T |  | 0.434 | 0.431 | 0.8876 | 0.397 | 0.406 | 0.7497 | 0.464 | 0.468 | | 0.9013 | 0.9847463 |
| rs4320932* | C/T |  | 0.213 | 0.202 | 0.5433 | 0.226 | 0.189 | 0.0611 | 0.318 | 0.265 | | 0.0316 | 0.0329268 |
| rs689* | A/T |  | 0.149 | 0.143 | 0.7449 | 0.112 | 0.131 | 0.2747 | 0.141 | 0.200 | | 0.0053 | 0.0337586 |
| rs7113485 | C/T |  | 0.288 | 0.268 | 0.3296 | 0.250 | 0.238 | 0.5551 | 0.343 | 0.333 | | 0.7158 | 0.6677892 |
| rs734351 | A/G |  | 0.383 | 0.378 | 0.8441 | 0.401 | 0.375 | 0.2994 | 0.423 | 0.417 | | 0.8436 | 0.7973326 |
| rs7924316 | G/T |  | 0.347 | 0.334 | 0.5471 | 0.347 | 0.345 | 0.9418 | 0.440 | 0.460 | | 0.4534 | 0.8202857 |
| IGF2R | rs894817 | G/A | G/G | 0.318 | 0.307 | 0.5769 | 0.279 | 0.267 | 0.6093 | 0.291 | 0.289 | | 0.9357 | 0.8979896 |
| rs609207 | T/G |  | 0.425 | 0.458 | 0.1524 | 0.453 | 0.477 | 0.3251 | 0.432 | 0.428 | | 0.871 | 0.3919303 |
| rs648253 | G/A |  | 0.478 | 0.498 | 0.3941 | 0.429 | 0.412 | 0.4683 | 0.486 | 0.455 | | 0.2515 | 0.4076676 |
| rs2274849 | G/A |  | 0.240 | 0.217 | 0.2252 | 0.221 | 0.209 | 0.569 | 0.236 | 0.223 | | 0.5827 | 0.5197549 |
| IGFBP1(**‡)** | rs4619 | A/G | I/M | 0.373 | 0.381 | 0.7246 | 0.367 | 0.328 | 0.0963 | 0.345 | 0.333 | | 0.64 | 0.3992808 |
| IGFBP3 | rs2471551 | C/G |  | 0.200 | 0.232 | 0.0846 | 0.137 | 0.147 | 0.5459 | 0.227 | 0.187 | | 0.0802 | 0.0824828 |
| ss95211008 | G/A | G/S | 0.000 | 0.000 | 1 | 0.001 | 0.001 | 0.8955 | 0.009 | 0.004 | | 0.2535 | 0.8131607 |
| ss95212739 | A/- |  | 0.114 | 0.098 | 0.2638 | 0.056 | 0.045 | 0.278 | 0.156 | 0.135 | | 0.2732 | 0.2515513 |
| rs6670 | A/T |  | 0.209 | 0.197 | 0.5381 | 0.161 | 0.164 | 0.8578 | 0.251 | 0.246 | | 0.8613 | 0.9334032 |
| IGFBP4 | rs11555390 | C/G |  | 0.008 | 0.009 | 0.6895 | 0.012 | 0.016 | 0.4817 | 0.019 | 0.018 | | 0.8763 | 0.8719720 |
| IGFBP5 | rs11575195 | C/T | A/A | 0.045 | 0.052 | 0.4986 | 0.035 | 0.032 | 0.7367 | 0.031 | 0.032 | | 0.8558 | 0.8886243 |
| IGFBP6 | ss95210418 | C/T |  | 0.002 | 0.003 | 0.6961 | 0.004 | 0.003 | 0.5573 | 0.017 | 0.003 | | 0.0163 | 0.1194044 |
| rs9658618 | C/T |  | 0.015 | 0.006 | 0.0534 | 0.004 | 0.003 | 0.5468 | 0.021 | 0.037 | | 0.0643 | 0.0506612 |
| INPPL1 (**†)** | rs2276047 | C/T |  | 0.216 | 0.234 | 0.3709 | 0.223 | 0.215 | 0.6985 | 0.217 | 0.235 | | 0.4219 | 0.6190613 |
| rs2276048 | C/T |  | 0.188 | 0.199 | 0.5327 | 0.214 | 0.194 | 0.306 | 0.187 | 0.206 | | 0.3818 | 0.4749961 |
| rs9886 | C/G |  | 0.057 | 0.070 | 0.2352 | 0.100 | 0.087 | 0.3525 | 0.069 | 0.059 | | 0.4284 | 0.3519072 |
| ITGA3 **(§)** | rs16948646 | G/A | A/T | 0.084 | 0.087 | 0.8436 | 0.103 | 0.111 | 0.5991 | 0.099 | 0.093 | | 0.7253 | 0.9190401 |
| rs2078864 | A/G |  | 0.083 | 0.081 | 0.8595 | 0.112 | 0.110 | 0.924 | 0.092 | 0.090 | | 0.9325 | 0.9963894 |
| rs1062484 | C/T |  | 0.271 | 0.272 | 0.9482 | 0.216 | 0.170 | 0.0213 | 0.251 | 0.235 | | 0.495 | 0.1620615 |
| ITGB1 | rs1935647 | A/G |  | 0.098 | 0.102 | 0.7602 | 0.090 | 0.088 | 0.8917 | 0.102 | 0.099 | | 0.8924 | 0.9854114 |
| rs2245844* | G/T |  | 0.440 | 0.477 | 0.1072 | 0.481 | 0.504 | 0.3409 | 0.455 | 0.391 | | 0.0168 | 0.0219444 |
| rs11009151 | T/A |  | 0.150 | 0.139 | 0.4966 | 0.171 | 0.137 | 0.0603 | 0.186 | 0.204 | | 0.4036 | 0.1832815 |
| rs2256455 | A/C |  | 0.283 | 0.301 | 0.3829 | 0.355 | 0.329 | 0.2566 | 0.371 | 0.414 | | 0.1058 | 0.1662436 |
| rs7079624 | C/T | Y/Y | 0.099 | 0.114 | 0.3139 | 0.118 | 0.125 | 0.6727 | 0.128 | 0.112 | | 0.3826 | 0.5397406 |
| rs2298141 | T/C | C/C | 0.149 | 0.136 | 0.4579 | 0.169 | 0.143 | 0.1446 | 0.181 | 0.212 | | 0.1645 | 0.1713707 |
| rs2230396 | C/A | G/G | 0.095 | 0.112 | 0.2346 | 0.114 | 0.112 | 0.8829 | 0.122 | 0.120 | | 0.9154 | 0.7670066 |
| ss95210293 | A/G | M/V | 0.000 | 0.000 | 1 | 0.000 | 0.000 | 1 | 0.001 | 0.000 | | 0.3767 | 0.9240048 |
| ss95211114 | T/C |  | 0.028 | 0.036 | 0.2913 | 0.046 | 0.048 | 0.8766 | 0.013 | 0.004 | | 0.0709 | 0.2364099 |
| LGALS3BP | ss95213495 | G/A | V/M | 0.028 | 0.027 | 0.8632 | 0.024 | 0.021 | 0.6561 | 0.019 | 0.027 | | 0.3558 | 0.7828577 |
| ss95211872 | C/T | A/A | 0.033 | 0.019 | 0.0597 | 0.051 | 0.055 | 0.7025 | 0.015 | 0.022 | | 0.3882 | 0.2213503 |
| LTA (**†)** | rs2857713 | T/C | C/R | 0.328 | 0.338 | 0.6693 | 0.311 | 0.320 | 0.6819 | 0.350 | 0.328 | | 0.4032 | 0.7591443 |
| rs1041981 | A/C | N/T | 0.465 | 0.444 | 0.3423 | 0.500 | 0.469 | 0.2025 | 0.368 | 0.352 | | 0.5383 | 0.3617569 |
| MIOX | rs3747273 | C/A |  | 0.216 | 0.222 | 0.7511 | 0.257 | 0.232 | 0.2413 | 0.251 | 0.262 | | 0.6526 | 0.6402645 |
| rs2232885 | G/A |  | 0.187 | 0.206 | 0.288 | 0.222 | 0.210 | 0.5498 | 0.229 | 0.226 | | 0.8947 | 0.6890541 |
| rs2232879 | G/A |  | 0.122 | 0.129 | 0.6644 | 0.152 | 0.166 | 0.4469 | 0.101 | 0.088 | | 0.4228 | 0.6563456 |
| MSR1 | rs351572 | C/T |  | 0.387 | 0.418 | 0.1761 | 0.435 | 0.444 | 0.6922 | 0.400 | 0.363 | | 0.1626 | 0.2499019 |
| rs6986419 | G/T |  | 0.199 | 0.177 | 0.2315 | 0.172 | 0.154 | 0.335 | 0.195 | 0.200 | | 0.822 | 0.4807765 |
| NFATC1 | rs9518* | T/C |  | 0.207 | 0.212 | 0.7715 | 0.165 | 0.201 | 0.0592 | 0.162 | 0.224 | | 0.0054 | 0.0108064 |
| rs16958940 | C/A | P/T | 0.120 | 0.136 | 0.2951 | 0.131 | 0.116 | 0.3627 | 0.094 | 0.072 | | 0.1678 | 0.2352451 |
| rs8097537 | C/T |  | 0.404 | 0.396 | 0.736 | 0.371 | 0.427 | 0.0184 | 0.398 | 0.426 | | 0.2963 | 0.0872511 |
| rs9966033 | T/C | S/S | 0.124 | 0.119 | 0.7736 | 0.112 | 0.109 | 0.8268 | 0.166 | 0.208 | | 0.055 | 0.3500129 |
| NFATC2 | rs2273642 | C/T |  | 0.263 | 0.294 | 0.1334 | 0.252 | 0.208 | 0.0349 | 0.278 | 0.261 | | 0.4973 | 0.0589927 |
| rs6021231 | A/G |  | 0.449 | 0.434 | 0.5117 | 0.311 | 0.334 | 0.3159 | 0.471 | 0.502 | | 0.2779 | 0.4005486 |
| rs228840 | T/C |  | 0.154 | 0.142 | 0.4714 | 0.126 | 0.137 | 0.4983 | 0.161 | 0.210 | | 0.0245 | 0.1119842 |
| NFATC3 | rs1073632 | G/A |  | 0.052 | 0.047 | 0.5744 | 0.028 | 0.024 | 0.6715 | 0.063 | 0.062 | | 0.9342 | 0.9158453 |
| rs8060893 | A/T |  | 0.135 | 0.138 | 0.8692 | 0.184 | 0.168 | 0.412 | 0.156 | 0.152 | | 0.8474 | 0.8811102 |
| NOS1(**‡)** | rs3741476* | G/A |  | 0.188 | 0.172 | 0.3932 | 0.203 | 0.139 | 0.0008 | 0.209 | 0.274 | | 0.0057 | 0.0001825 |
| rs3741475* | T/C | D/D | 0.305 | 0.290 | 0.5051 | 0.269 | 0.237 | 0.1513 | 0.323 | 0.393 | | 0.0091 | 0.0241348 |
| NOX4 **(§)** | rs490934* | G/C |  | 0.089 | 0.057 | 0.0076 | 0.123 | 0.150 | 0.1002 | 0.057 | 0.053 | | 0.7854 | 0.0215094 |
| ss95210746 | A/G | S/G | 0.008 | 0.000 | 0.0064 | 0.001 | 0.003 | 0.4546 | 0.003 | 0.003 | | 0.7976 | 0.0590905 |
| ss95210752 | G/A | R/K | 0.000 | 0.000 | 1 | 0.000 | 0.006 | 0.0137 | 0.000 | 0.000 | | 1 | 0.1985671 |
| ss95212324 | G/A | R/K | 0.001 | 0.000 | 0.3029 | 0.000 | 0.001 | 0.2754 | 0.000 | 0.000 | | 1 | 0.5479539 |
| rs3816123 | C/A |  | 0.285 | 0.272 | 0.5651 | 0.446 | 0.454 | 0.7559 | 0.322 | 0.395 | | 0.0101 | 0.0917838 |
| OGT | rs3736670 | G/A |  | 0.104 | 0.104 | 0.9966 | 0.109 | 0.110 | 0.9253 | 0.099 | 0.140 | | 0.021 | 0.2463826 |
| PARP1 | rs1805414 | T/C | A/A | 0.373 | 0.368 | 0.8214 | 0.373 | 0.417 | 0.066 | 0.307 | 0.334 | | 0.2868 | 0.2150693 |
| rs1136410 | T/C | V/A | 0.201 | 0.208 | 0.7072 | 0.211 | 0.261 | 0.015 | 0.140 | 0.122 | | 0.349 | 0.0824563 |
| rs2271349 | T/G |  | 0.202 | 0.209 | 0.713 | 0.210 | 0.258 | 0.0209 | 0.140 | 0.130 | | 0.5825 | 0.1476710 |
| rs2271347 | C/T |  | 0.199 | 0.228 | 0.1238 | 0.135 | 0.139 | 0.8248 | 0.254 | 0.235 | | 0.4016 | 0.3811572 |
| PDGFB **(§)** | rs9622979 | C/T |  | 0.062 | 0.050 | 0.2805 | 0.062 | 0.051 | 0.3332 | 0.053 | 0.066 | | 0.3194 | 0.3187245 |
| rs4821877 | G/A |  | 0.464 | 0.494 | 0.1987 | 0.427 | 0.404 | 0.3268 | 0.453 | 0.478 | | 0.3468 | 0.2699687 |
| rs2285100 | A/G |  | 0.437 | 0.421 | 0.5001 | 0.486 | 0.454 | 0.2108 | 0.429 | 0.419 | | 0.7386 | 0.5303445 |
| PDGFRA | ss95210906 | T/C | S/P | 0.129 | 0.122 | 0.6871 | 0.089 | 0.125 | 0.0193 | 0.116 | 0.114 | | 0.9273 | 0.1853321 |
| rs869978* | T/C |  | 0.239 | 0.215 | 0.2284 | 0.159 | 0.213 | 0.0049 | 0.228 | 0.214 | | 0.5381 | 0.0216228 |
| rs12511976 | T/C |  | 0.080 | 0.086 | 0.628 | 0.075 | 0.078 | 0.8039 | 0.109 | 0.113 | | 0.836 | 0.9431558 |
| PDGFRB **(§)** | rs740750 | C/T |  | 0.439 | 0.425 | 0.5491 | 0.398 | 0.392 | 0.8198 | 0.488 | 0.482 | | 0.8503 | 0.9268479 |
| ss95212947 | G/A | E/K | 0.028 | 0.030 | 0.8439 | 0.012 | 0.016 | 0.4913 | 0.033 | 0.049 | | 0.1477 | 0.4711255 |
| rs2304061 | C/T |  | 0.272 | 0.269 | 0.8946 | 0.172 | 0.178 | 0.7618 | 0.267 | 0.220 | | 0.0559 | 0.3659665 |
| rs2302273 | C/T |  | 0.188 | 0.187 | 0.9583 | 0.158 | 0.159 | 0.9732 | 0.211 | 0.213 | | 0.9224 | 0.9994919 |
| PLA2G7(**†)** | rs1051931 | T/C | V/A | 0.217 | 0.198 | 0.3252 | 0.255 | 0.241 | 0.5085 | 0.242 | 0.247 | | 0.8538 | 0.6881340 |
| PON2 (**†)** | rs12026 | C/G | A/G | 0.261 | 0.253 | 0.6596 | 0.418 | 0.395 | 0.3404 | 0.216 | 0.212 | | 0.8582 | 0.7712295 |
| [rs7493](http://www.ncbi.nlm.nih.gov/SNP/snp_ref.cgi?rs=7493) | C/G | C/S | 0.263 | 0.252 | 0.5857 | 0.417 | 0.401 | 0.4855 | 0.217 | 0.210 | | 0.7675 | 0.8032690 |
| PPARG(**‡)** | rs3856806 | C/T | H/H | 0.145 | 0.151 | 0.6824 | 0.190 | 0.194 | 0.8141 | 0.097 | 0.111 | | 0.4209 | 0.8205067 |
| rs1801282 | C/G | P/A | 0.144 | 0.168 | 0.1531 | 0.180 | 0.176 | 0.8198 | 0.103 | 0.091 | | 0.4707 | 0.4625949 |
| rs1800571 | C/A | P/Q | 0.000 | 0.001 | 0.3316 | 0.000 | 0.004 | 0.0573 | 0.001 | 0.002 | | 0.857 | 0.2213737 |
| PRKCD | rs2306571 | C/G |  | 0.350 | 0.344 | 0.8081 | 0.256 | 0.264 | 0.6962 | 0.378 | 0.383 | | 0.8575 | 0.9622455 |
| rs11546559 | T/C | D/D | 0.147 | 0.139 | 0.609 | 0.126 | 0.118 | 0.6356 | 0.172 | 0.154 | | 0.3734 | 0.6944725 |
| rs2306572 | A/G |  | 0.239 | 0.243 | 0.8568 | 0.273 | 0.234 | 0.0908 | 0.237 | 0.255 | | 0.4698 | 0.3576032 |
| ss95210314 | G/A | E/K | 0.002 | 0.002 | 0.9512 | 0.000 | 0.003 | 0.1218 | 0.000 | 0.000 | | 1 | 0.6346940 |
| RAP1B | rs3213921 | T/G |  | 0.348 | 0.343 | 0.8078 | 0.335 | 0.342 | 0.7628 | 0.301 | 0.274 | | 0.2856 | 0.7473291 |
| RELA | rs11227247* | T/G |  | 0.110 | 0.129 | 0.2074 | 0.099 | 0.106 | 0.6083 | 0.109 | 0.171 | | 0.001 | 0.0063434 |
| rs11820062 | G/A |  | 0.488 | 0.488 | 0.9866 | 0.460 | 0.427 | 0.1752 | 0.455 | 0.502 | | 0.0842 | 0.2063171 |
| RXRG | rs2281986 | G/A |  | 0.432 | 0.454 | 0.3413 | 0.411 | 0.404 | 0.7665 | 0.485 | 0.477 | | 0.7742 | 0.7841750 |
| rs157865 | G/T |  | 0.350 | 0.381 | 0.1647 | 0.322 | 0.335 | 0.569 | 0.393 | 0.424 | | 0.2617 | 0.2840715 |
| rs2134095 | C/T | V/V | 0.316 | 0.344 | 0.2019 | 0.334 | 0.326 | 0.7391 | 0.312 | 0.337 | | 0.3279 | 0.4193139 |
| rs283690 | C/T |  | 0.449 | 0.460 | 0.6262 | 0.454 | 0.445 | 0.7286 | 0.479 | 0.468 | | 0.6757 | 0.8844956 |
| SCNN1A | rs11614164 | C/T |  | 0.459 | 0.436 | 0.3071 | 0.478 | 0.456 | 0.3822 | 0.447 | 0.461 | | 0.6195 | 0.5131117 |
| rs2228576 | A/G | T/A | 0.329 | 0.293 | 0.1254 | 0.284 | 0.286 | 0.9285 | 0.320 | 0.325 | | 0.8618 | 0.5962606 |
| rs3741914 | A/G |  | 0.340 | 0.339 | 0.9447 | 0.402 | 0.389 | 0.5965 | 0.273 | 0.266 | | 0.7475 | 0.9428472 |
| SCNN1B | rs238547* | T/C | P/P | 0.401 | 0.450 | 0.0321 | 0.492 | 0.468 | 0.3229 | 0.451 | 0.383 | | 0.0148 | 0.0074168 |
| rs2303153* | G/C |  | 0.466 | 0.489 | 0.331 | 0.472 | 0.468 | 0.8522 | 0.470 | 0.546 | | 0.0065 | 0.0497910 |
| SCNN1G | rs4247210 | G/C |  | 0.278 | 0.256 | 0.2764 | 0.305 | 0.280 | 0.2573 | 0.313 | 0.346 | | 0.2053 | 0.2067310 |
| rs5732 | A/G |  | 0.231 | 0.246 | 0.4259 | 0.238 | 0.239 | 0.9687 | 0.233 | 0.242 | | 0.6918 | 0.8676140 |
| rs5728 | A/G |  | 0.426 | 0.416 | 0.6727 | 0.436 | 0.433 | 0.9059 | 0.421 | 0.447 | | 0.3626 | 0.8063987 |
| SELE **(§)** | rs5359 | A/G |  | 0.324 | 0.324 | 0.9948 | 0.323 | 0.329 | 0.7922 | 0.293 | 0.284 | | 0.7312 | 0.9814290 |
| rs2205850 | C/T |  | 0.130 | 0.148 | 0.2767 | 0.178 | 0.207 | 0.1345 | 0.157 | 0.155 | | 0.9389 | 0.3486856 |
| rs5361 | A/C | S/R | 0.102 | 0.106 | 0.7859 | 0.089 | 0.083 | 0.6602 | 0.113 | 0.116 | | 0.8471 | 0.9493511 |
| rs2076059 | G/A |  | 0.414 | 0.400 | 0.5508 | 0.334 | 0.320 | 0.575 | 0.402 | 0.404 | | 0.942 | 0.8774163 |
| rs1534904 | A/C |  | 0.309 | 0.316 | 0.75 | 0.316 | 0.330 | 0.5272 | 0.291 | 0.278 | | 0.5913 | 0.8204776 |
| ss95212776 | A/C | K/T | 0.010 | 0.001 | 0.0088 | 0.005 | 0.003 | 0.3743 | 0.005 | 0.007 | | 0.6992 | 0.0587678 |
| rs5368 | C/T | H/Y | 0.090 | 0.110 | 0.1421 | 0.136 | 0.159 | 0.1689 | 0.113 | 0.097 | | 0.3464 | 0.1435059 |
| rs5355 | C/T | L/F | 0.037 | 0.038 | 0.8829 | 0.037 | 0.042 | 0.6362 | 0.039 | 0.047 | | 0.4477 | 0.8382100 |
| SGK **(§)** | rs3215438 | -/G |  | 0.489 | 0.506 | 0.4591 | 0.491 | 0.491 | 0.9795 | 0.492 | 0.445 | | 0.0798 | 0.3539471 |
| rs1743965 | G/A |  | 0.009 | 0.010 | 0.7117 | 0.005 | 0.016 | 0.0334 | 0.006 | 0.007 | | 0.9464 | 0.2698043 |
| rs1743966 | T/C |  | 0.204 | 0.197 | 0.6956 | 0.218 | 0.195 | 0.2349 | 0.196 | 0.211 | | 0.4789 | 0.5316016 |
| SLCO2A1 | rs10935090 | G/A | S/S | 0.132 | 0.117 | 0.3189 | 0.146 | 0.158 | 0.4888 | 0.149 | 0.121 | | 0.1592 | 0.2860643 |
| rs4640563 | G/C |  | 0.104 | 0.113 | 0.5734 | 0.050 | 0.064 | 0.2017 | 0.110 | 0.132 | | 0.2245 | 0.2938147 |
| rs4241362 | G/A |  | 0.132 | 0.148 | 0.3105 | 0.197 | 0.186 | 0.6003 | 0.166 | 0.148 | | 0.3817 | 0.5076847 |
| ss95213481 | G/A | A/T | 0.216 | 0.200 | 0.408 | 0.187 | 0.199 | 0.5393 | 0.186 | 0.198 | | 0.5991 | 0.6695587 |
| SLC12A3(**‡)** | rs11643718 | G/A | R/Q | 0.088 | 0.081 | 0.6153 | 0.139 | 0.135 | 0.8143 | 0.127 | 0.126 | | 0.9794 | 0.9643963 |
| ss95210287 | C/T | R/W | 0.017 | 0.025 | 0.2263 | 0.013 | 0.007 | 0.2341 | 0.007 | 0.000 | | 0.0502 | 0.0651827 |
| rs37031 | C/T |  | 0.477 | 0.462 | 0.5342 | 0.373 | 0.346 | 0.2541 | 0.404 | 0.390 | | 0.6171 | 0.5490214 |
| rs37030 | C/T |  | 0.482 | 0.471 | 0.64 | 0.377 | 0.348 | 0.2311 | 0.399 | 0.378 | | 0.4408 | 0.4862179 |
| rs1529927 | C/G | A/G | 0.051 | 0.048 | 0.7196 | 0.032 | 0.031 | 0.8838 | 0.024 | 0.020 | | 0.5772 | 0.9193026 |
| SLC25A4 | ss95210842* | C/G | R/G | 0.015 | 0.049 | 0.0001 | 0.029 | 0.030 | 0.9507 | 0.004 | 0.006 | | 0.6995 | 0.0037822 |
| SLC9A1 **(§)** | rs5810 | T/C |  | 0.400 | 0.403 | 0.913 | 0.377 | 0.388 | 0.62 | 0.328 | 0.331 | | 0.8958 | 0.9683525 |
| SLC9A2 | rs6757258 | A/G |  | 0.407 | 0.421 | 0.5201 | 0.476 | 0.503 | 0.2799 | 0.379 | 0.354 | | 0.3374 | 0.4201627 |
| SLC9A3 | rs2244223 | A/G |  | 0.417 | 0.446 | 0.2109 | 0.464 | 0.463 | 0.972 | 0.346 | 0.374 | | 0.3096 | 0.4797072 |
| rs2244240 | G/C |  | 0.113 | 0.085 | 0.0448 | 0.053 | 0.069 | 0.1795 | 0.136 | 0.144 | | 0.6583 | 0.1057509 |
| ss95212731 | G/A | A/T | 0.369 | 0.383 | 0.5169 | 0.411 | 0.381 | 0.2081 | 0.383 | 0.359 | | 0.3473 | 0.3620018 |
| SLC9A3R1 | rs734232 | G/A |  | 0.451 | 0.465 | 0.5438 | 0.452 | 0.446 | 0.8114 | 0.420 | 0.414 | | 0.8185 | 0.9162738 |
| SMAD3(**‡)** | rs2289791 | G/T |  | 0.248 | 0.238 | 0.6027 | 0.207 | 0.222 | 0.475 | 0.237 | 0.237 | | 0.9898 | 0.8659910 |
| rs11629568 | T/G |  | 0.431 | 0.442 | 0.6479 | 0.387 | 0.392 | 0.8336 | 0.481 | 0.406 | | 0.0066 | 0.0802850 |
| rs2289261 | G/C |  | 0.347 | 0.315 | 0.1465 | 0.430 | 0.436 | 0.825 | 0.326 | 0.354 | | 0.2905 | 0.3496310 |
| ss95213933 | A/G | I/V | 0.070 | 0.055 | 0.1859 | 0.034 | 0.045 | 0.2567 | 0.059 | 0.038 | | 0.0887 | 0.0905711 |
| SOD1 | rs3216079 | -/A |  | 0.041 | 0.055 | 0.1526 | 0.103 | 0.091 | 0.4308 | 0.038 | 0.061 | | 0.0458 | 0.0712304 |
| SOD2(**‡)** | rs5746136 | G/A |  | 0.263 | 0.306 | 0.0405 | 0.341 | 0.336 | 0.8199 | 0.304 | 0.304 | | 0.9977 | 0.3383283 |
| rs1799725 | T/C | V/A | 0.465 | 0.526 | 0.0087 | 0.493 | 0.493 | 0.9969 | 0.469 | 0.466 | | 0.9293 | 0.1405735 |
| rs2855116 | T/G |  | 0.474 | 0.530 | 0.0149 | 0.498 | 0.501 | 0.8871 | 0.455 | 0.439 | | 0.5596 | 0.1327311 |
| SORD | rs3110657 | A/C |  | 0.252 | 0.233 | 0.3736 | 0.207 | 0.215 | 0.7186 | 0.238 | 0.268 | | 0.2475 | 0.4908447 |
| rs1042217 | G/C |  | 0.040 | 0.026 | 0.0868 | 0.022 | 0.022 | 0.9016 | 0.025 | 0.034 | | 0.3202 | 0.2877176 |
| SPP1 | ss76877789 | T/G |  | 0.252 | 0.269 | 0.4451 | 0.248 | 0.249 | 0.963 | 0.222 | 0.204 | | 0.4632 | 0.7790197 |
| rs4754 | T/C | D/D | 0.287 | 0.247 | 0.0676 | 0.270 | 0.293 | 0.3326 | 0.310 | 0.344 | | 0.219 | 0.1006014 |
| rs1126772 | A/G |  | 0.227 | 0.201 | 0.173 | 0.130 | 0.137 | 0.6807 | 0.235 | 0.268 | | 0.1999 | 0.2772280 |
| SREBF1 | rs2297508 | G/C |  | 0.378 | 0.357 | 0.3641 | 0.390 | 0.395 | 0.8423 | 0.369 | 0.425 | | 0.0354 | 0.1710087 |
| TGFB1(**‡)** | rs1982073 | C/T | P/L | 0.371 | 0.364 | 0.7416 | 0.292 | 0.309 | 0.4649 | 0.377 | 0.393 | | 0.5463 | 0.7652612 |
| rs2241717 | G/T |  | 0.448 | 0.427 | 0.3546 | 0.369 | 0.394 | 0.2801 | 0.465 | 0.429 | | 0.1815 | 0.2357867 |
| rs8179181 | C/T |  | 0.244 | 0.292 | 0.0265 | 0.220 | 0.224 | 0.8515 | 0.251 | 0.238 | | 0.5838 | 0.1936755 |
| TGFBR1 | rs1571589 | A/G |  | 0.198 | 0.189 | 0.6234 | 0.140 | 0.156 | 0.3616 | 0.201 | 0.204 | | 0.9119 | 0.7879974 |
| rs928180 | A/G |  | 0.081 | 0.111 | 0.0303 | 0.117 | 0.107 | 0.5103 | 0.092 | 0.082 | | 0.5218 | 0.1406696 |
| TIE | rs2275180 | A/G |  | 0.370 | 0.400 | 0.1834 | 0.308 | 0.347 | 0.1077 | 0.383 | 0.361 | | 0.4135 | 0.1418213 |
| TIMM44 | ss95213459 | C/T |  | 0.077 | 0.079 | 0.8968 | 0.079 | 0.067 | 0.3623 | 0.066 | 0.074 | | 0.5869 | 0.7685011 |
| ss95210700 | A/G |  | 0.076 | 0.075 | 0.9259 | 0.081 | 0.068 | 0.306 | 0.065 | 0.063 | | 0.8876 | 0.8382158 |
| ss95212875 | G/A |  | 0.300 | 0.326 | 0.2255 | 0.261 | 0.245 | 0.4632 | 0.303 | 0.302 | | 0.983 | 0.6023658 |
| rs9676352 | C/T |  | 0.228 | 0.249 | 0.2817 | 0.187 | 0.191 | 0.8271 | 0.237 | 0.225 | | 0.6078 | 0.6889487 |
| TIMP1 | ss95210393 | G/A |  | 0.405 | 0.381 | 0.2879 | 0.388 | 0.342 | 0.0477 | 0.333 | 0.311 | | 0.3999 | 0.1084510 |
| rs1043428 | C/T | P/P | 0.017 | 0.006 | 0.0229 | 0.014 | 0.013 | 0.8674 | 0.032 | 0.030 | | 0.8364 | 0.2241594 |
| rs6520277* | T/C | F/F | 0.490 | 0.530 | 0.0849 | 0.489 | 0.556 | 0.0063 | 0.457 | 0.469 | | 0.6569 | 0.0142596 |
| TIMP2 **(§)** | rs8176329 | C/T |  | 0.234 | 0.221 | 0.5041 | 0.203 | 0.208 | 0.8176 | 0.242 | 0.260 | | 0.4499 | 0.7611532 |
| ss95212005 | C/A |  | 0.198 | 0.197 | 0.9596 | 0.183 | 0.210 | 0.1651 | 0.184 | 0.177 | | 0.7423 | 0.6387225 |
| TIMP3 **(§)** | ss95210378 | AT/-- |  | 0.249 | 0.268 | 0.3435 | 0.240 | 0.225 | 0.4832 | 0.216 | 0.239 | | 0.3095 | 0.4302413 |
| UBA52 **(§)** | rs2302055 | C/T |  | 0.440 | 0.446 | 0.7827 | 0.372 | 0.385 | 0.6065 | 0.428 | 0.495 | | 0.0134 | 0.1198873 |
| rs6554 | G/T |  | 0.412 | 0.416 | 0.8478 | 0.371 | 0.380 | 0.7163 | 0.389 | 0.421 | | 0.2355 | 0.6916106 |
| UCP1 | rs7688743 | C/T |  | 0.186 | 0.165 | 0.2436 | 0.160 | 0.158 | 0.9213 | 0.189 | 0.193 | | 0.8536 | 0.7697091 |
| rs2071416* | T/G |  | 0.034 | 0.038 | 0.6323 | 0.071 | 0.062 | 0.4842 | 0.063 | 0.110 | | 0.0018 | 0.0202005 |
| rs2270565 | A/T | M/L | 0.089 | 0.096 | 0.5785 | 0.079 | 0.078 | 0.9307 | 0.076 | 0.064 | | 0.3935 | 0.7957338 |
| UNC13B **(§)** | rs661712* | T/C |  | 0.329 | 0.291 | 0.0763 | 0.352 | 0.261 | 0.0001 | 0.287 | 0.300 | | 0.5904 | 0.0004013 |
| rs2282001* | G/C |  | 0.072 | 0.067 | 0.6768 | 0.117 | 0.085 | 0.0347 | 0.048 | 0.073 | | 0.0569 | 0.0394419 |
| rs2281999* | C/T |  | 0.340 | 0.307 | 0.1396 | 0.373 | 0.275 | 0.000001 | 0.293 | 0.296 | | 0.8933 | 0.0000179 |
| ss95210605 | G/A | R/Q | 0.008 | 0.003 | 0.1708 | 0.020 | 0.019 | 0.8371 | 0.004 | 0.002 | | 0.4606 | 0.4886651 |
| ss95213168 | C/T |  | 0.000 | 0.001 | 0.3295 | 0.034 | 0.034 | 0.9459 | 0.000 | 0.000 | | 1 | 0.8868184 |
| VASP | rs10995 | G/A |  | 0.261 | 0.242 | 0.3518 | 0.336 | 0.325 | 0.6123 | 0.270 | 0.249 | | 0.3853 | 0.5466486 |
| rs3810334 | A/G |  | 0.169 | 0.179 | 0.5578 | 0.171 | 0.145 | 0.1513 | 0.163 | 0.147 | | 0.4252 | 0.3539453 |
| VEGFA(**‡)** | rs2146323* | C/A |  | 0.361 | 0.324 | 0.0897 | 0.399 | 0.369 | 0.2239 | 0.350 | 0.301 | | 0.0558 | 0.0345974 |
| rs3024997 | G/A |  | 0.335 | 0.323 | 0.5762 | 0.235 | 0.231 | 0.8538 | 0.310 | 0.348 | | 0.1376 | 0.4953990 |
| rs3025000 | C/T |  | 0.332 | 0.318 | 0.5159 | 0.238 | 0.235 | 0.9012 | 0.280 | 0.306 | | 0.2992 | 0.6841158 |
| VEGFB | rs12366035* | C/T | D/D | 0.336 | 0.263 | 0.0008 | 0.273 | 0.253 | 0.3707 | 0.275 | 0.312 | | 0.1445 | 0.0026413 |
| VEGFC | rs585706 | G/A |  | 0.083 | 0.067 | 0.1795 | 0.070 | 0.091 | 0.1166 | 0.090 | 0.116 | | 0.1148 | 0.0605933 |
| WNK1 | rs956868 | A/C | T/P | 0.161 | 0.157 | 0.8205 | 0.284 | 0.250 | 0.122 | 0.155 | 0.149 | | 0.7783 | 0.5304898 |
| rs17755373 | C/T | P/L | 0.007 | 0.014 | 0.1343 | 0.022 | 0.017 | 0.4879 | 0.027 | 0.023 | | 0.6424 | 0.3866501 |
| rs2255390 | A/G |  | 0.426 | 0.456 | 0.1787 | 0.426 | 0.457 | 0.2035 | 0.431 | 0.380 | | 0.0643 | 0.0594162 |
| WNK2 | rs7032194 | G/C |  | 0.139 | 0.115 | 0.1122 | 0.119 | 0.107 | 0.4532 | 0.155 | 0.141 | | 0.4761 | 0.2818928 |
| rs10821093 | T/C |  | 0.274 | 0.237 | 0.0653 | 0.278 | 0.279 | 0.9635 | 0.302 | 0.309 | | 0.7714 | 0.4175026 |
| ss95213137 | G/A | G/E | 0.022 | 0.013 | 0.1441 | 0.018 | 0.005 | 0.0266 | 0.010 | 0.012 | | 0.7628 | 0.0697562 |
| rs10761203* | G/A | V/M | 0.491 | 0.528 | 0.1112 | 0.450 | 0.481 | 0.2032 | 0.471 | 0.405 | | 0.0188 | 0.0165260 |
| WNK3 | ss95210758 | T/G |  | 0.004 | 0.008 | 0.3005 | 0.022 | 0.024 | 0.8387 | 0.007 | 0.009 | | 0.6705 | 0.7365205 |

Minor allele frequencies of each studied polymorphism are provided.

(1)Test fordifference in allele frequencies between cases and controls using 2 with 1 degree of freedom.

**(2)**Globalp-value of association provided by the Fisher's method.

* Polymorphisms with nominal association (p<0.05) across the three countries;

† Genes  reported associated with DN or related phenotypes, which were not re-sequenced for de-novo polymorphisms in this study and included only reported SNPs

‡Genes reported associated with DN included in our re-sequencing effort for new polymorphisms

§ Candidate genes from the literature not previously associated with DN and included in the re-sequencing effort to identify new polymorphisms

**S4:** *Genotype distribution of the UNC13B_rs13293564 according to diabetic nephropathy status in the three EURAGEDIC populations*.

|  | Denmark | | Finland | | | France | | Whole | |
| --- | --- | --- | --- | --- | --- | --- | --- | --- | --- |
|  | Controls | Cases | Controls | | Cases | Controls | Cases | Controls | Cases |
| GG | 184 (40%) | 169 (35%) | 151 (32%) | | 108 (28%) | 133 (36%) | 104 (36%) | 468 (36%) | 381 (33%) |
| GT | 222 (48%) | 230 (47%) | 239 (51%) | | 181 (47%) | 182 (49%) | 136 (46%) | 643 (50%) | 547 (47%) |
| TT | 53 (12%) | 85 (18%) | 77 (17%) | | 97 (25%) | 55 (15%) | 51 (18%) | 185 (14%) | 233 (20%) |
| Genotypic Association | p = 0.023 | | p= 0.007 | | | p = 0.629 | | p = 0.0006 | |
| Allelic Association | p = 0.013 | | p = 0.007 | | | p = 0.597 | | p = 0.001 | |
| OR(1) | 1.598 [1.102 – 2.316] p = 0.013 | | | 1.568 [1.109 – 2.216] p = 0.011 | | 1.262 [0.829 – 1.923] p = 0.278 | | 1.489 [1.199 – 1.850] p = 0.0003 | |
| OR(2) | 1.524 [1.025 – 2.267] p = 0.037 | | | 1.566 [1.093 – 2.244] p = 0.014 | | 1.262 [0.817 – 1.951] p = 0.294 | | 1.464 [1.166 – 1.837] p = 0.001 | |
| OR(3) | 1.355 [0.883 -2.079] p = 0.165 | | | 1.672 [1.157 – 2.416] p = 0.006 | | 1.299 [0.836 – 2.017] p = 0.245 | | 1.459 [1.153 – 1.847] p = 0.002 | |
| OR(4) | 1.566 [0.975 -2.515] p = 0.064 | | 1.951 [1.263 – 3.014] p = 0.003 | | | 1.511 [0.936 – 2.438] p = 0.091 | | 1.682 [1.289 – 2.194] p = 0.0001 | |

1 After adjusting for age and gender, under the assumption of a recessive model

2 After adjusting for age, gender and hb1ac under the assumption of a recessive model

3 After adjusting for age, gender, smoking and hb1ac under the assumption of a recessive model

4 After adjusting for age, gender, smoking, hb1ac and proliferative retinopathy under the assumption of a recessive model

**S5**: *Genotype distribution of the UNC13B_rs13293564 polymorphism according to retinopathy status in the EURAGEDIC study*

|  |  |  | rs13293564 | | |  |
| --- | --- | --- | --- | --- | --- | --- |
| Proliferative Retinopathy | Diabetic  Nephropathy |  | GG | GT | TT | OR(1) |
|  |  |  |  |  |  |  |
| No | No | N = 774 | 283 (37%) | 375 (48%) | 116 (15%) | 1.976 [1.321 - 2.954]  p= 0.0009 |
| Yes | N = 211 | 74 (35%) | 85 (40%) | 52 (25%) |
|  |  |  |  |  |  |  |
| Yes | No | N = 517 | 185 (36%) | 265 (51%) | 67 (13%) | 1.557 [1.1.121 - 2.162]  p= 0.0082 |
| Yes | N = 943 | 304 (32%) | 458 (49%) | 181 (19%) |

1 After adjusting for age and gender, under the assumption of a recessive model

The test of interaction between both tests is not significant (p= 0.3686)

**S6A** Genotype distribution derived from rs2281999 and rs13293564 according to DN status in the three EURAGEDIC populations.

Denmark

| Controls | rs13293564 | | |  | Cases | rs13293564 | | |
| --- | --- | --- | --- | --- | --- | --- | --- | --- |
| rs2281999 | GG | GT | TT |  | rs2281999 | GG | GT | TT |
| CC | 41 (10%) | 105 (24%) | 40 (9%) |  | CC | 40 (9%) | 101 (23%) | 70 (16%) |
| CT | 96 (22%) | 96 (22%) | 6 (1%) |  | CT | 81 (18%) | 102 (25%) | 2 |
| TT | 40 (9%) | 7 (1%) | 0 |  | TT | 35 (8%) | 3 (1%) | 0 |

Finland

| Controls | rs13293564 | | |  | Cases | rs13293564 | | |
| --- | --- | --- | --- | --- | --- | --- | --- | --- |
| rs2281999 | GG | GT | TT |  | rs2281999 | GG | GT | TT |
| CC | 24 (6%) | 81 (19%) | 59 (14%) |  | CC | 25 (7%) | 79 (22%) | 84 (23%) |
| CT | 66 (15%) | 134 (31%) | 8 (2%) |  | CT | 54 (15%) | 93 (25%) | 6 (2%) |
| TT | 50 (12%) | 6 (1%) |  |  | TT | 24 (6%) | 0 | 0 |

France

| Controls | rs13293564 | | |  | Cases | rs13293564 | | |
| --- | --- | --- | --- | --- | --- | --- | --- | --- |
| rs2281999 | GG | GT | TT |  | rs2281999 | GG | GT | TT |
| CC | 47 (13%) | 75 (22%) | 48 (14%) |  | CC | 29 (11%) | 61 (23%) | 47 (17%) |
| CT | 57 (16%) | 93 (27%) | 3 (1%) |  | CT | 42 (16%) | 58 (21%) | 2 (1%) |
| TT | 21 (6%) | 2 (1%) | 1 |  | TT | 22 (8%) | 7 (3%) | 0 |

**S6B** Genotype distribution derived from rs661712 and rs13293564 according to DN status in the three EURAGEDIC populations.

Denmark

| Controls | rs13293564 | | |  | Cases | rs13293564 | | |
| --- | --- | --- | --- | --- | --- | --- | --- | --- |
| rs661712 | GG | GT | TT |  | rs661712 | GG | GT | TT |
| CC | 43 (9%) | 116 (25%) | 47 (10%) |  | CC | 43 (9%) | 116 (24%) | 85 (18%) |
| CT | 99 (22%) | 99 (22%) | 6 (1%) |  | CT | 88 (18%) | 112 (23%) | 0 |
| TT | 41 (9%) | 7 (2%) | 0 |  | TT | 38 (8%) | 2 | 0 |

Finland

| Controls | rs13293564 | | |  | Cases | rs13293564 | | |
| --- | --- | --- | --- | --- | --- | --- | --- | --- |
| rs661712 | GG | GT | TT |  | rs661712 | GG | GT | TT |
| CC | 33 (7%) | 91 (20%) | 69 (15%) |  | CC | 29 (8%) | 83 (22%) | 92 (24%) |
| CT | 67 (14%) | 140 (30%) | 8 (2%) |  | CT | 57 (15%) | 96 (25%) | 3 (1%) |
| TT | 50 (11%) | 6 (1%) | 0 |  | TT | 22 (6%) | 0 | 0 |

France

| Controls | rs13293564 | | |  | Cases | rs13293564 | | |
| --- | --- | --- | --- | --- | --- | --- | --- | --- |
| rs661712 | GG | GT | TT |  | rs661712 | GG | GT | TT |
| CC | 49 (13%) | 82 (22%) | 51 (14%) |  | CC | 33 (11%) | 62 (22%) | 48 (17%) |
| CT | 62 (17%) | 97 (26%) | 3 (1%) |  | CT | 45 (16%) | 67 (23%) | 3 (1%) |
| TT | 21 (6%) | 2 (1%) | 1 |  | TT | 23 (8%) | 7 (2%) | 0 |

**S6C** Genotype distribution derived from rs10114937 and rs13293564 according to DN status in the three EURAGEDIC populations.

Denmark

| Controls | rs13293564 | | |  | Cases | rs13293564 | | |
| --- | --- | --- | --- | --- | --- | --- | --- | --- |
| rs10114937 | GG | GT | TT |  | rs10114937 | GG | GT | TT |
| TT | 44 (10%) | 116 (25%) | 47 (10%) |  | TT | 44 (9%) | 115 (24%) | 85 (18%) |
| TC | 97 (21%) | 98 (21%) | 6 (1%) |  | TC | 86 (18%) | 110 (23%) | 0 |
| CC | 43 (10%) | 7 (2%) | 0 |  | CC | 39 (8%) | 3 (1%) | 0 |

Finland

| Controls | rs13293564 | | |  | Cases | rs13293564 | | |
| --- | --- | --- | --- | --- | --- | --- | --- | --- |
| rs10114937 | GG | GT | TT |  | rs10114937 | GG | GT | TT |
| TT | 31 (7%) | 89 (19%) | 67 (15%) |  | TT | 28 (7%) | 82 (21%) | 92 (24%) |
| TC | 68 (15%) | 140 (30%) | 8 (2%) |  | TC | 57 (15%) | 97 (25%) | 4 (1%) |
| CC | 51 (11%) | 6 (1%) | 0 |  | CC | 22 (6%) | 1 | 0 |

France

| Controls | rs13293564 | | |  | Cases | rs13293564 | | |
| --- | --- | --- | --- | --- | --- | --- | --- | --- |
| rs10114937 | GG | GT | TT |  | rs10114937 | GG | GT | TT |
| TT | 48 (13%) | 84 (23%) | 49 (13%) |  | TT | 31 (11%) | 63 (22%) | 48 (17%) |
| TC | 61 (17%) | 94 (26%) | 3 (1%) |  | TC | 46 (16%) | 66 (23%) | 1 |
| CC | 21 (6%) | 2 (1%) | 1 |  | CC | 23 (8%) | 6 (2%) | 0 |

**S7** Haplotype frequencies distribution derived from the rs13293564, rs10972365, rs4879877, rs781161, rs10121009, rs661712 and rs17296428 according to DN status in the EURAGEDIC populations.

| Polymorphisms | | | | | | | | Denmark | |  | Finland | |  | France | |
| --- | --- | --- | --- | --- | --- | --- | --- | --- | --- | --- | --- | --- | --- | --- | --- |
| Controls | Cases |  | Controls | Cases |  | Controls | Cases |
| G | C | A | A | C | T | C |  | 0.124 | 0.103 |  | 0.066 | 0.046 |  | 0.117 | 0.111 |
| G | C | A | A | T | T | C |  | 0.114 | 0.110 |  | 0.167 | 0.127 |  | 0.116 | 0.107 |
| G | T | A | A | C | C | C |  | 0.098 | 0.088 |  | 0.062 | 0.067 |  | 0.077 | 0.092 |
| G | T | A | A | T | T | C |  | 0.066 | 0.070 |  | 0.097 | 0.077 |  | 0.053 | 0.049 |
| G | T | A | T | C | C | C |  | 0.055 | 0.044 |  | 0.033 | 0.026 |  | 0.055 | 0.0049 |
| G | T | A | T | C | C | G |  | 0.148 | 0.125 |  | 0.119 | 0.139 |  | 0.155 | 0.136 |
| T | T | A | T | C | C | C |  | 0.206 | 0.224 |  | 0.216 | 0.255 |  | 0.237 | 0.265 |
| T | T | G | A | C | C | C |  | 0.120 | 0.171 |  | 0.165 | 0.186 |  | 0.122 | 0.112 |
|  |  |  |  |  |  |  | |  |  |  |  |  |  |  |  |
| Test for haplotypic association | | | | | | | | 2 = 17.17 with 7 df, p = 0.016 | |  | 2 = 15.44 with 7 df, p = 0.031 | |  | 2 = 3.34 with 7 df, p = 0.852 | |
| Test for haplotypic association adjusted (1) for the recessive effect of the rs13293564-T allele | | | | | | | | 2 = 11.84 with 7 df, p = 0.106 | |  | 2 = 8.59 with 7 df, p = 0.283 | |  | 2 = 2.943 with 7 df, p = 0.890 | |

Polymorphisms are ordered according to their position on the genomic sequence, rs13293564, rs10972365, rs4879877, rs781161, rs10121009, rs661712 and rs17296428.
(1). The TT genotype was added into the haplotype regression model as a standard covariate.

It can be noticed that the rs13293564-T allele was carried out by only two main haplotypes that tended to be more frequent in cases than in controls in the Denmark and Finland populations. One of these two haplotypes also tended to more frequent in French cases than in French controls.

**S8** Illustration of a multilocus genotype association analysis of 3 SNPs*, rs4879877, rs7851161 and rs13293564, with DN in the whole EURAGEDIC study.

|  |  |  | rs13293564 | | | | | | |
| --- | --- | --- | --- | --- | --- | --- | --- | --- | --- |
|  |  |  | Controls | | |  | Cases | | |
| rs4879877 | rs7851161 |  | GG | GT | TT |  | GG | GT | TT |
| AA | AA |  | 185 (15%) | 21 (2%) | 1 |  | 141 (12%) | 9 | 1 |
|  | AT |  | 206 (16%) | 246 (20%) | 11 |  | 175 (15%) | 215 (19%) | 6 |
|  | TT |  | 56 (4%) | 114 (9%) | 73 (6%) |  | 45 (4%) | 100 (9%) | 85 (7%) |
| AG | AA |  | 11 | 153 (12%) | 5 |  | 7 | 135 (12%) | 3 |
|  | AT |  | 2 | 94 (7%) | 74 (6%) |  | 3 | 76 (7%) | 101 (9%) |
|  | TT |  |  | 1 |  |  |  | 1 | 1 |
| GG | AA |  |  | 2 | 14 |  | 1 | 5 | 30 |
|  |  |  | 460 | 631 | 178 |  | 372 | 541 | 227 |

Number of individuals are shown in the table. % are mainly given in parenthesis for numbers that represent at least 2% of the total number of cases or controls.

* The rs4879877 and rs7851161 were chosen for this example because the two haplotypes carrying the rs13293564-T allele differed from each other at the position defined by the rs4879877 and rs7851161. The difference between cases and controls mainly came from the rs13293564-TT genotype.

**S9**. ***Genotype distribution of the UNC13B_rs13293564 polymorphism according to nephropathy stage in the EURAGEDIC study and the replication FinnDiane sample.***

|  |  | Nephropathy stage | | | |
| --- | --- | --- | --- | --- | --- |
|  |  | Normoalbuminuria | Microalbuminuria | Macroalbuminuria | ESRD |
|  | GG | 184 (40.1%) | 20 (33.3%) | 157 (35.2%) | 12 (30.7%) |
| Denmark | GT | 222 (48.4%) | 30 (50%) | 211 (47.4%) | 19 48.7%) |
|  | TT | 53 (11.5%) | 10 (16.7%) | 77 (17.3%) | 8 (20.5%) |
|  |  |  |  |  |  |
|  | GG | 133 (35.9%) | 66 (34.2%) | 82 (36.2%) | 22 (34.3%) |
| France | GT | 182 (49.2%) | 94 (48.7%) | 100 (44.2%) | 36 (56.2%) |
|  | TT | 55 (14.9%) | 33 (17.1%) | 44 (19.4%) | 6 (9.3%) |
|  |  |  |  |  |  |
|  | GG | 151 (32.3%) | 44 (29.1%) | 73 (27.6%) | 35 (28.6%) |
| Finland | GT | 239 (51.2%) | 62 (41.1%) | 125 (47.3%) | 56 (45.9%) |
|  | TT | 77 (16.5%) | 45 (29.8%) | 66 (25%) | 31 (25.4%) |
|  |  |  |  |  |  |
|  | GG | 186 (30.3%) | 63 (23.3%) | 70 (26%) | 36 (25.1%) |
| FinnDiane | GT | 321 (52.3%) | 150 (55.6%) | 140 (52%) | 68 (47.5%) |
|  | TT | 107 (17.4%) | 57 (21.1%) | 59 (22%) | 39 (27.2%) |
|  |  |  |  |  |  |
|  | GG | 654 (34.2%) | 193 (28.6%) | 382 (31.7%) | 105 (28.5%) |
| WHOLE | GT | 964 (50.5%) | 336 (49.9%) | 576 (47.8%) | 179 (48.6%) |
|  | TT | 292 (15.3%) | 145 (21.5%) | 246 (20.4%) | 84 (22.8%) |

**Online Appendix Supplementary Figure 1:** Linkage Disequilibrium (D') matrix between UNC13b gene polymorphisms in the EURAGEDIC populations.

**Supplementary Figure 1:** *Linkage Disequilibrium (D') matrix between UNC13b gene polymorphisms in the EURAGEDIC populations*

**A: In Denmark**


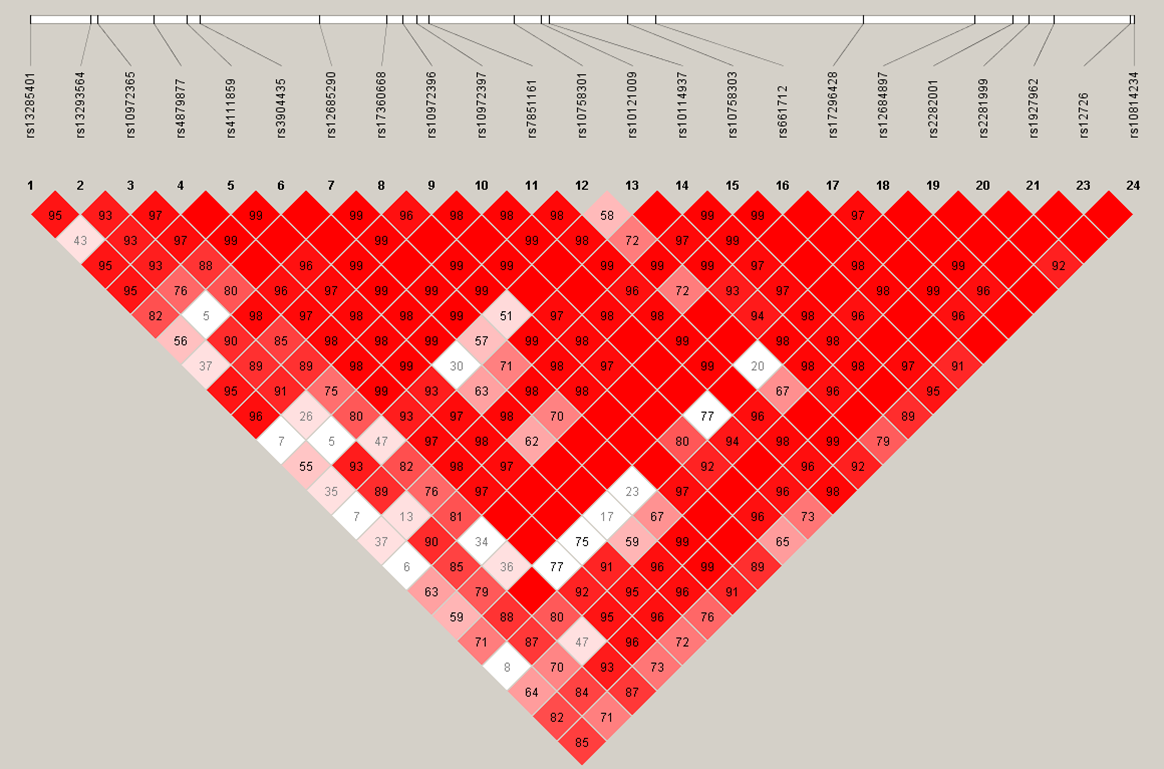

**B: In Finland**


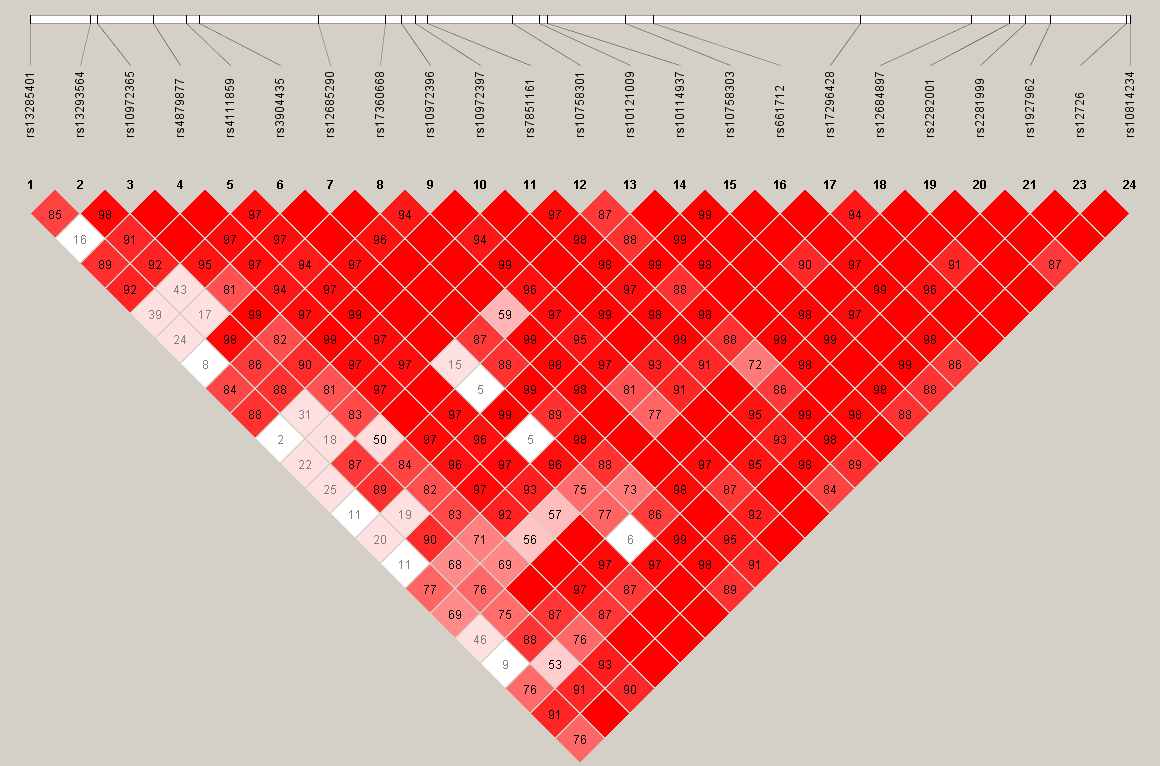


**C: In France**


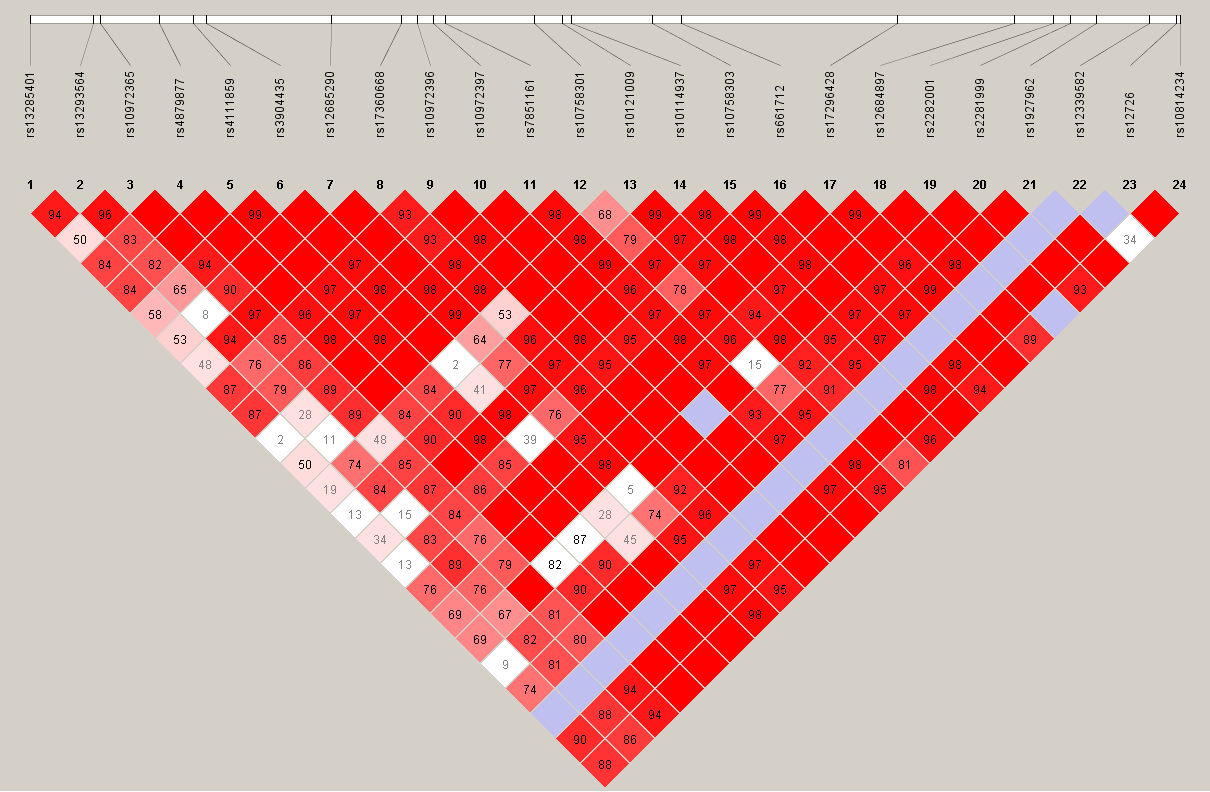


**Online Appendix Supplemental Figure 2:** **Diagnostic PCR for *UNC13B* transcripts in various cell lines and tissues.**

**
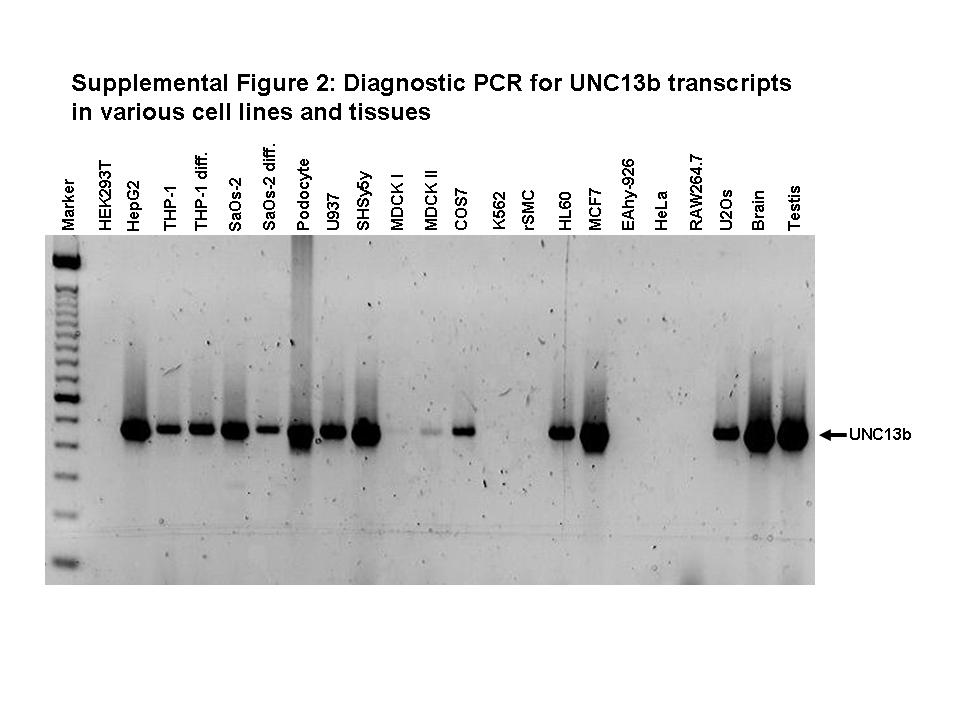
**
